# Supplementary material for: Multi-omics reveals the positive leverage of plant secondary metabolites on the gut microbiota in a non-model mammal
Source: PubMed Central journal article supplement (PMC8456708; doi:10.1186/s40168-021-01142-6), 2021-09-22
Supplement: 40168_2021_1142_MOESM2_ESM.pdf [file 40168_2021_1142_MOESM2_ESM.pdf]

# Supplementary Materials

## **Multi-omics reveals the positive leverage of plant secondary metabolites on the gut microbiota in a non-model mammal**

Le Wang<sup>1,2†</sup>, Guangping Huang<sup>1†</sup>, Rong Hou<sup>3†</sup>, Dunwu Qi<sup>3</sup>, Qi Wu<sup>1</sup>, Yonggang Nie<sup>1,2</sup>,

Zhenqiang Zuo<sup>5</sup>, Rui Ma<sup>3</sup>, Wenliang Zhou<sup>1,4</sup>, Yingjie Ma<sup>1,2</sup>, Yibo Hu<sup>1,2</sup>, Zhisong

Yang<sup>6</sup>, Li Yan<sup>1</sup>, Fuwen Wei<sup>1,2,4\*</sup>

\*Corresponding author. Email: weifw@ioz.ac.cn

### **This PDF file includes:**

Supplemental Materials and Methods

Supplemental References

Fig. S1. Gut microbial alterations with diet-associated seasons.

Fig. S2. The composition of microbiota at the level of phylum and genus.

Fig. S3. The covariation of gene richness and MGS number per sample.

Fig. S4. The seasonal differences of metagenomic species.

Fig. S5. Seasonally different metabolites in fecal samples.

Fig. S6. Heatmap of different metabolites in feces between seasons.

Fig. S7. Associations of fecal metabolome with metagenome for captive pandas.

Fig. S8. Associations of fecal metabolome with metagenome for wild pandas.

Fig. S9. Seasonal differences of genes involved quorum sensing.

Fig. S10. The seasonal differences of microbial virulence factors (VFs).

Table S1 Dietary bamboos and habitual grouping information.

Table S2 All flavonoids detected in all sample types (dietary bamboos, feces and plasma).

Table S3 Qualitative determination of all flavonoids.

Table S4 Monomers with different proportion in diet and feces.

Table S5 Sample information for metagenomic analysis and assembly information.

Table S6 All the 144 MGS.

Table S7 All the 112 nonflavonoid compounds (NFCs) in feces.

## **Supplementary Materials and Methods**

### **Study site, subjects and sample collection**

**Sampling in the wild.** All the wild dietary bamboos and fecal samples were collected in Foping National Natural Reserve, Shaanxi, Qinling Mountains. Samples were collected from November of 2017 to May of 2018. Following their diet, samples were divided into two groups: WL (collected in winter (from November to next March) when feeding on the leaves of *Bashania fargesii*) and WS (collected in April and May when feeding on shoots of *B. fargesii*). All fecal samples were collected by direct tracking. We adopted the strictest criteria for fresh samples: either our skilled seekers have seen the giant panda, or the feces was of residual heat. With the surfaces in contact with environment excluded, feces were collected immediately after defecation snap-frozen in liquid nitrogen and shipped to the laboratory on dry ice. Diet samples were collected at every site where fresh feces were sampled.

**Sampling in captivity.** All the captive dietary bamboos, feces and plasma samples were collected with approval of Institutional Animal Care and Use Committee in Chengdu Research Base of Giant Panda Breeding, Sichuan, China. Samples were collected from May of 2018 to February of 2019, in which May and June of 2018 correspond to period of bamboo shoot-eating stage (CS\_I: collected in May when feeding on *Pleidolastus amarus*; CS\_II: collected in June when feeding on *Phyllostachys nidularia*), December and January correspond to period of bamboo leaves-eating (CL: when feeding on *B. fargesii*). Totally, 27 adult giant pandas in good health (15 females and 12 males) were enrolled, of which no subjects were fed antibiotics within the previous month. 23

pandas were captive-born and 4 were wild-born but captive-fed 8-14 years.

## **Metabolomics profiling of food, feces and plasma samples**

### **Targeted flavonoids profiling**

**Sample extract.** The freeze-dried samples were crushed using a mixer mill (MM400, Retsch, Laichi, Germany) with a zirconia bead for 1.5 min at 30 Hz. 100 mg of powder was weighed and extracted overnight at 4°C with 1.0 mL 70% aqueous methanol. Following centrifugation at  $10,000 \times g$  for 10 min, the extracts were absorbed (CNWBOND Carbon-GCB SPE Cartridge, 250 mg, 3 mL; ANPEL, Shanghai, China) and filtrated (SCAA-104, 0.22  $\mu$  m pore size; ANPEL, Shanghai, China) before LC-MS analysis.

**Mass spectrometry (MS).** The sample extracts were analyzed using an LC-ESI-MS/MS system (UPLC, Shim-pack UFLC SHIMADZU CBM30A system; MS, Applied Biosystems 6500 QTRAP). LIT and triple quadrupole (QQQ) scans were acquired on a triple quadrupole-linear ion trap mass spectrometer (Q TRAP), API 6500 Q TRAP LC/MS/MS System, equipped with an ESI Turbo Ion-Spray interface, operating in a positive ion mode and controlled by Analyst 1.6.3 software (AB Sciex, Waltham, MA, USA). Liquid chromatography (LC)-based separation and multiple-reaction-monitoring (MRM) transitions were optimized using a local library of reference compounds to achieve absolute quantification on triple quadrupoles MS (QqQ). The presence of flavonoids was determined using a UPLC-ESI-MS/MS-based, widely targeted metabolome. Based on the self-built database MWDB (Metware Biotechnology Co., Ltd. Wuhan, China) and public database of metabolite information,

the metabolites of the samples were qualitatively and quantitatively analyzed by MS. The characteristic ions of each substance were screened out by the triple quadrupole rod, and the signal strength of the characteristic ions were obtained in the detector. The MS file under the sample was opened with MultiaQuant software 3.0.3 to carry out the integration and correction of chromatographic peaks, and the relative content of the corresponding substances in the peak area of each chromatographic peak were calculated. Finally, all chromatographic peak area integral data were derived. In order to compare the contents of each metabolite in different samples, we calibrated the mass spectrum peaks detected by each metabolite in different samples based on the information of metabolite retention time and peak pattern(1).

**Metabolic profiling of non-flavonoids compounds (NFCs).** Fecal samples were thawed on ice-bath to diminish degradation. About 10mg of each sample was weighted and transferred to a new 1.5mL tube. 25 $\mu$ L of water was added and the sample was homogenated with zirconium oxide beads for 3 minutes. 185 $\mu$ L of ACN/Methanol (8/2) was added to extract the metabolites. The sample was centrifuged at 18000g for 20 minutes. Then the supernatant was transferred to a 96-well plate. The following procedures were performed on a Biomek 4000 workstation (Biomek 4000, Beckman Coulter, Inc., Brea, California, USA). 20 $\mu$ L of freshly prepared derivative reagents was added to each well. The plate was sealed and the derivatization was carried out at 30 $^{\circ}$ C for 60 min. After derivatization, 350 $\mu$ L of ice-cold 50% methanol solution was added to dilute the sample. Then the plate was stored at -20 $^{\circ}$ C for 20 minutes and followed by 4000g centrifugation at 4  $^{\circ}$ C for 30 minutes. 135 $\mu$ L of supernatant was transferred to a

new 96-well plate with 15 $\mu$ L internal standards in each well. Serial dilutions of derivatized stock standards were added to the left wells. Finally, an ultra-performance liquid chromatography coupled to tandem mass spectrometry (UPLC-MS/MS) system (ACQUITY UPLC-Xevo TQ-S, Waters Corp., Milford, MA, USA) was used to quantitate the microbial metabolite.

### **Metagenomic analysis**

**Rarefaction curve analysis, gene richness and diversity.** To assess gene richness in all samples, we generated a rarefaction curve. For a given number of samples, we performed a randomized sampling  $n$  times ( $n$  is the sample number) in each group, respectively, and estimated the total number of genes that could be identified from these samples.

**Functional annotation, KO profiles and virulence factor profiles.** To annotate the metagenomes, we aligned the nonredundant gut microbiome gene set against the Kyoto Encyclopedia of Genes and Genomes (KEGG) database using BLASTP with  $1e-5$  and “single-directional best hit”. The identification of virulence genes was performed by comparing the annotated protein sequences of the non-redundant gene set with BLASTP against the VFDB database (full dataset). Hits with an  $e$ -value  $< 1e-5$ , percent identity  $> 80\%$ , and alignment length  $> 50$  bp were considered positive.

### **Association between metagenome and metabolome**

Co-inertia analysis (CoIA) was performed on MGS abundance profiles and metabolite abundance profiles of two seasonal samples to assess the relationship between MGS and metabolites that differed in abundance between seasons. The

associations of metabolites and MGS were established by R software (3.5.1, psych package), and the plots were generated by R software (3.5.1, vegan package).

### **Fecal culture *in vitro* with bamboo flavonoids**

Fresh feces were collected immediately after defecation from Beijing Zoo. The subject giant panda was an adult female named Meng Meng (Stud# 822). It mainly fed on the bamboo leaves of *Phyllostachys propinqua McClure*. Fecal bacterial suspension were prepared in triplicate for following culture. The culture medium was supplied by Qingdao Hope Bio-Technology Co., Ltd (Qingdao, China). Its formula is as follows (g/L): Peptone from Casein, 15.0; Yeast Extract, 5.0; D(+)glucose, 5.5; Sodim Thioglycollate, 0.5; L-Cystine, 0.5; Sodium Chloride, 2.5; Sodium Resazurin, 0.001; Agar, 0.75; Final pH7.1±0.2 at 25°C. Bamboo flavonoids were produced by Bioruler (No: RH42691). 100 µl of bacterial suspension were inoculated, following by 24-h culture at 37 °C under anaerobic conditions.

Bacteria were rinsed by 1ml of sterile PBS following by centrifugation. Genomic DNA was extracted QIAamp PowerFecal DNA Kit (Qiagen, Germany). The v3-v4 region of the bacterial 16S rRNA gene was amplified with the following primers (27F: 5'- ACTCCTACGGGAGGCAGCAG-3' and 806R: 5'-GGACTACHVGGGTWTCTA AT-3'). Sequencing of the pooled amplicons was conducted by Majorbio Bio-Pharm Technology Co. Ltd. (Shanghai, China). Barcodes and sequencing primers were trimmed before assembly. The data were analyzed on the free online platform of Majorbio Cloud Platform ([www.majorbio.com](http://www.majorbio.com)).

### **Supplemental References**

1. Chen W, Gong L, Guo ZL, Wang WS, Zhang H, Liu XQ, et al. A novel integrated method for large-scale detection, identification, and quantification of widely targeted metabolites: application in the study of rice metabolomics. *Mol Plant*. 2013; 6: 1769–80.



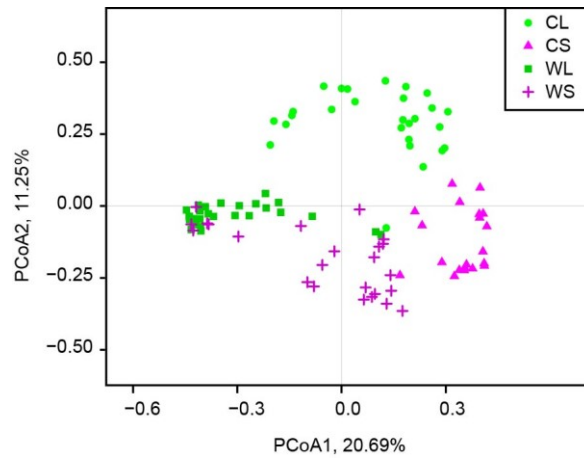

**Fig. S1. Gut microbial alterations with diet-associated seasons.** Seasonal differential genes separated the seasonal groups for both the wild and captive pandas. Principal coordinates analysis was performed on the basis of the Bray-Curtis distance for seasonally different genes ( $P < 0.01$ , Wilcoxon rank sum test, FDR  $< 0.05$ ). PCoA1, principal coordinate 1; PCoA2, principal coordinate 2.

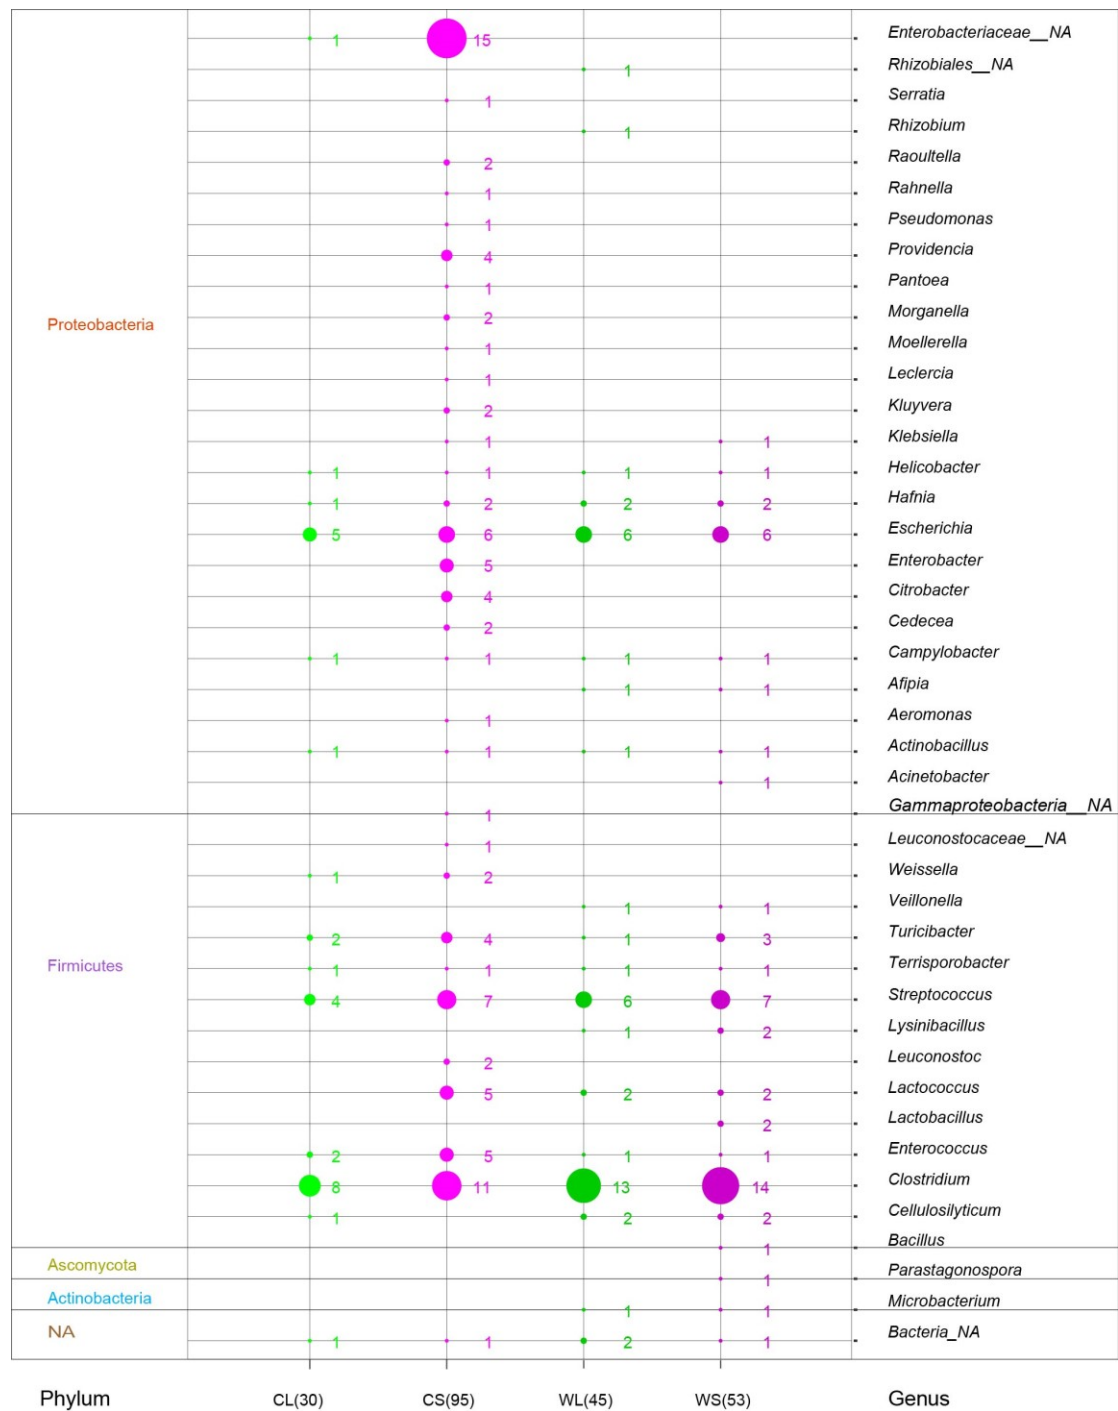

**Fig. S2. The composition of microbiota at the level of phylum and genus.** The size of bubbles indicated the number of MGS (figures on the right) in the corresponding genus. MGS which were not identified were labeled with “NA”. No bubble at one node indicated no MGS belonging to the genus were detected in the given group. The figures along with the group names referred to the total number of MGS in each group.

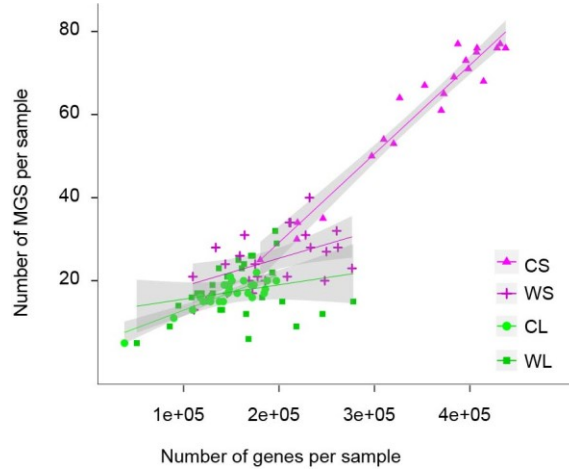

**Fig. S3. The covariation of gene richness and MGS number per sample.** MGS, Metagenomic species. A linear fitting (the solid lines in four colors and the 95% confidence interval in gray) of the numbers of MGS versus gene numbers showed the positive correlations between gene and MGS richness (WL:  $P = 0.2061$ , WS:  $P = 0.0115^*$ , CL:  $P = 4.01e-8^{***}$ , CS:  $P = 8.45e-14^{***}$ , \*  $0.01 < P \text{ value} < 0.05$ , \*\*\* $P \text{ value} < 0.001$ ).

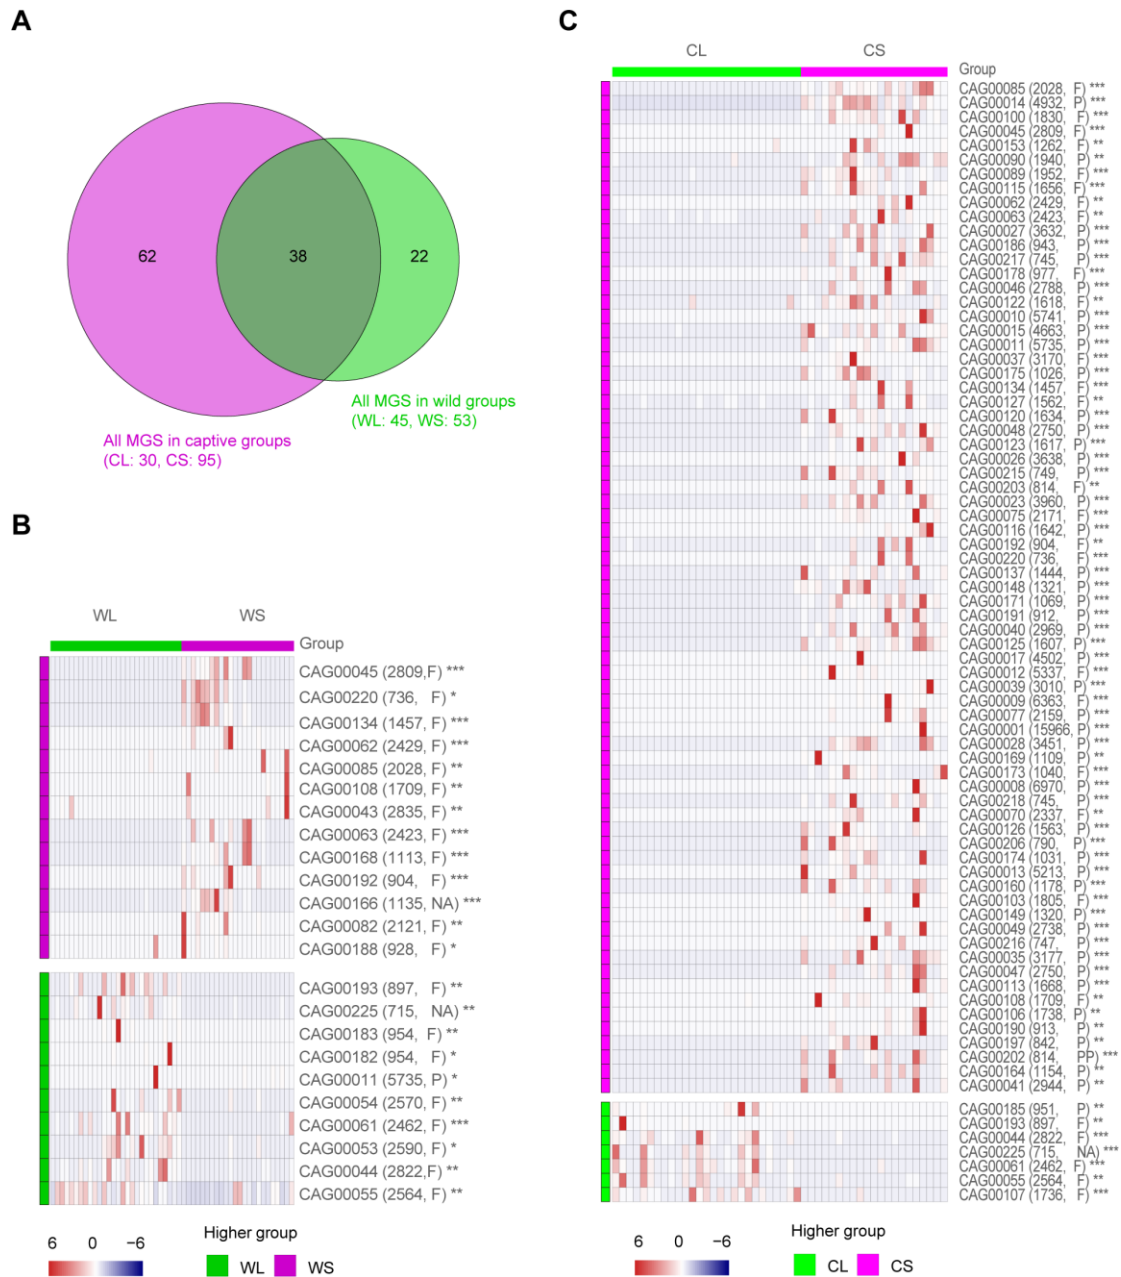

**Fig. S4. The seasonal differences of metagenomic species. (A)** Venn plot of metagenomic species (MGS) of wild and captive groups. **(B-C)** Heatmap of differential MGS between leaf season and shoot season in wild **(B)** and captivity **(C)**. For **B** and **C**, the numbers in parentheses next to each MGS number represent the gene number of this MGS, and the following capital letter indicate the corresponding phylum: F, Firmicutes; P, Proteobacteria; NA, not identified. \*  $0.01 < P$  value  $< 0.05$ , \*\*\*  $P$  value  $< 0.001$ .

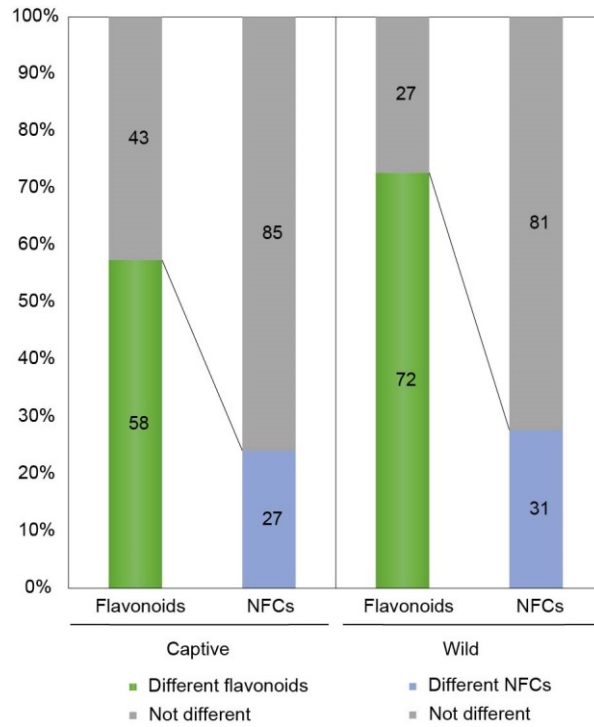

**Fig. S5. Seasonally different metabolites in fecal samples.** The composition of seasonally different flavonoids and cometabolites ( $P < 0.01$ , Wilcoxon rank sum test,  $FDR < 0.05$ ,  $VIP > 1$ ) with regard to the proportion of total number. The figures of different metabolites were labeled in the bar.

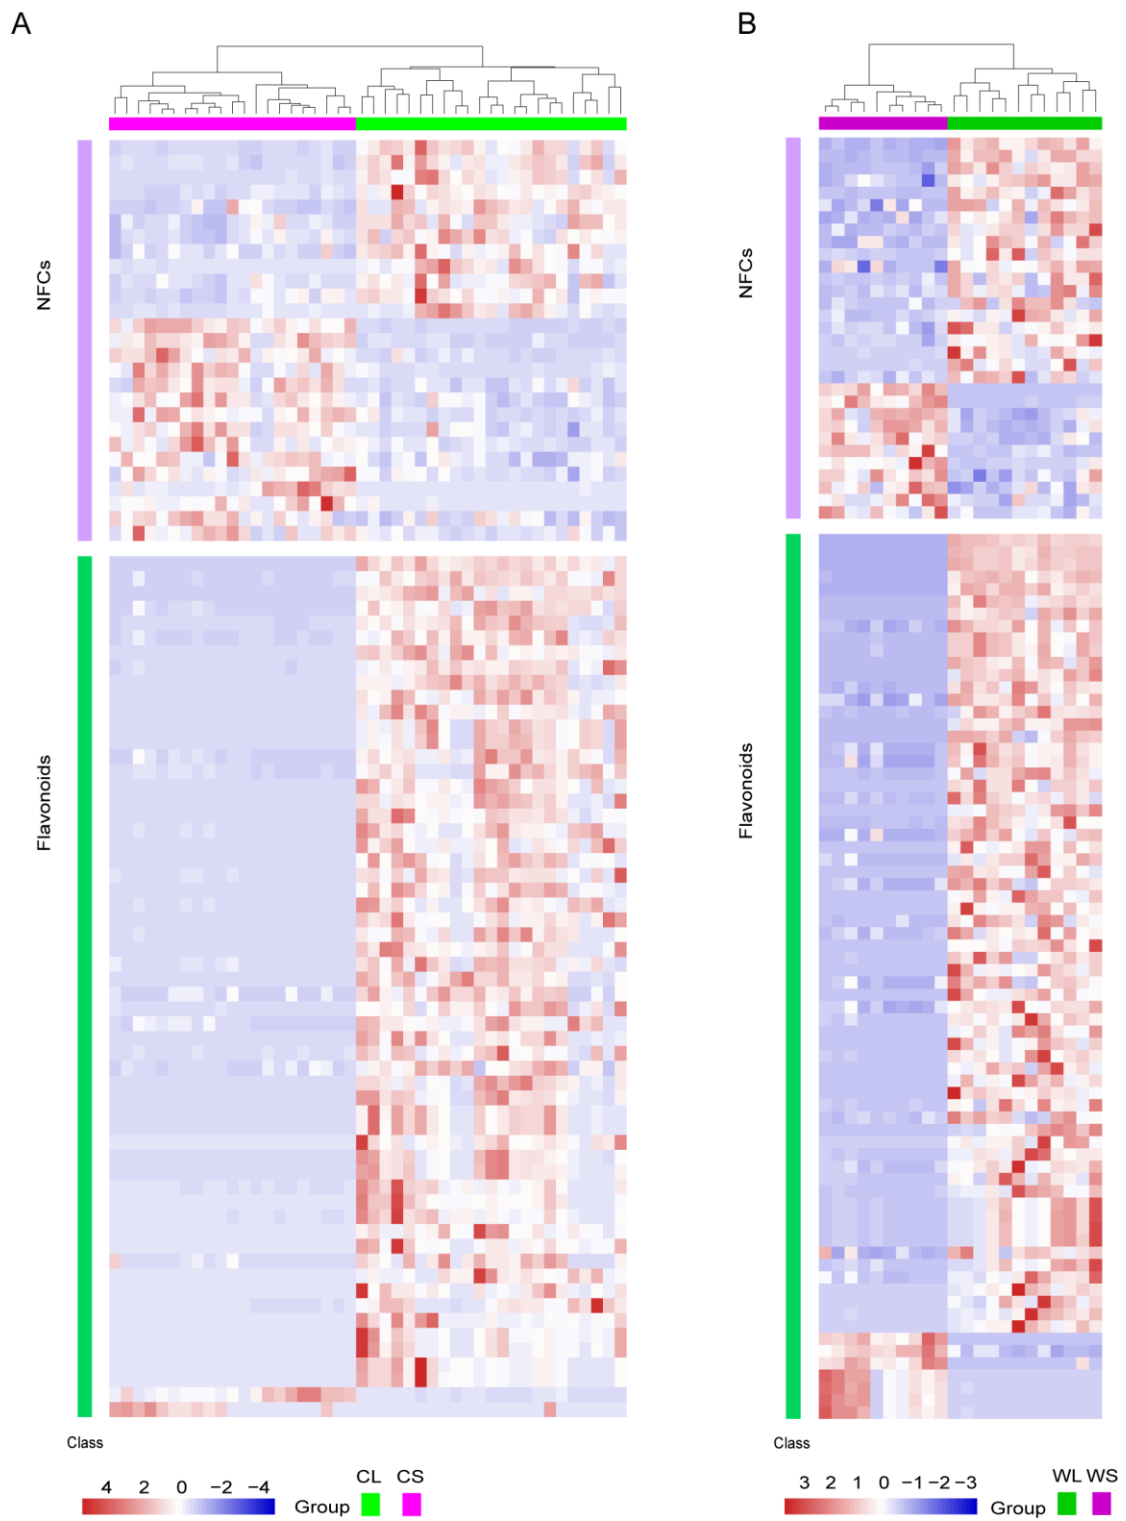

**Fig. S6. Heatmap of different metabolites in feces between seasons. (A) Captive groups. (B) Wild groups.**



and NFCs (n=27), respectively. MGS in green and pink denote Firmicutes (n=28) and Proteobacteria (n=49).



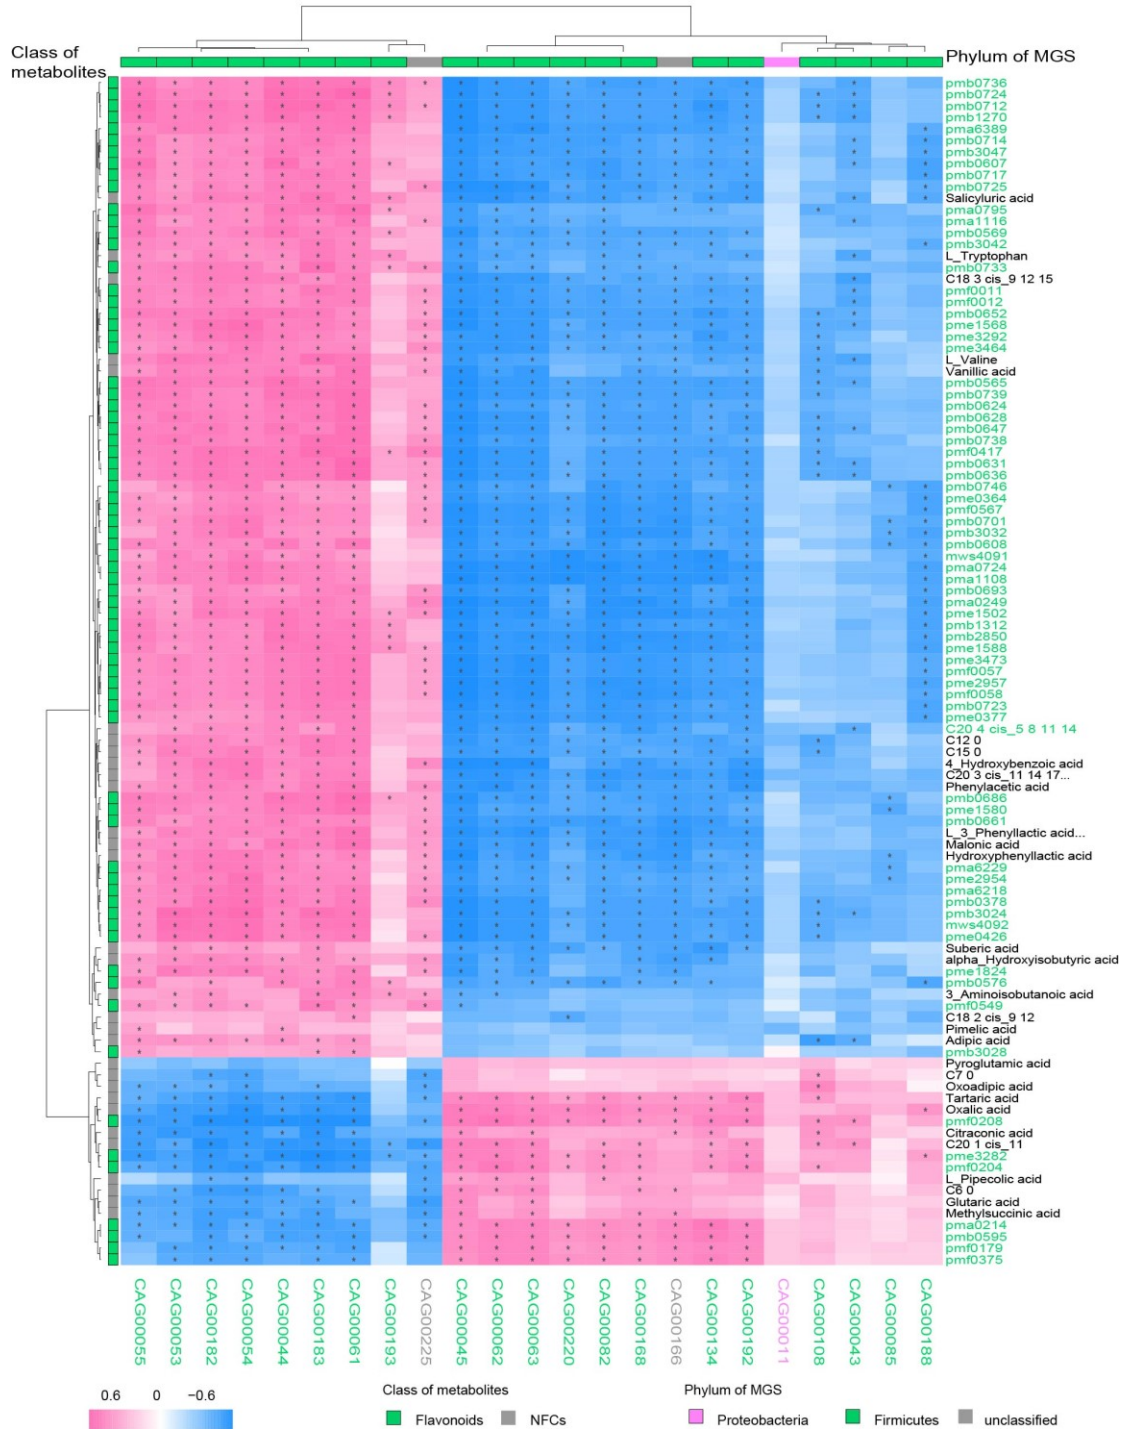

**Fig. S8. Associations of fecal metabolome with metagenome for wild pandas.** The heat map of the Spearman's rank correlation coefficient between fecal metabolites ( $P < 0.01$ , Wilcoxon rank sum test, FDR  $< 0.05$ , VIP  $> 1$ ) and metagenomic species (MGS) ( $P < 0.01$ , Wilcoxon rank sum test, FDR  $< 0.05$ ).  $*P < 0.01$ ,  $|r| > 0.6$ ; Spearman's rank correlation. Metabolites in green and black denote flavonoids ( $n=72$ ) and NFCs ( $n=31$ ),

respectively. MGS in green and pink denote Firmicutes (n=20) and Proteobacteria (n=1).

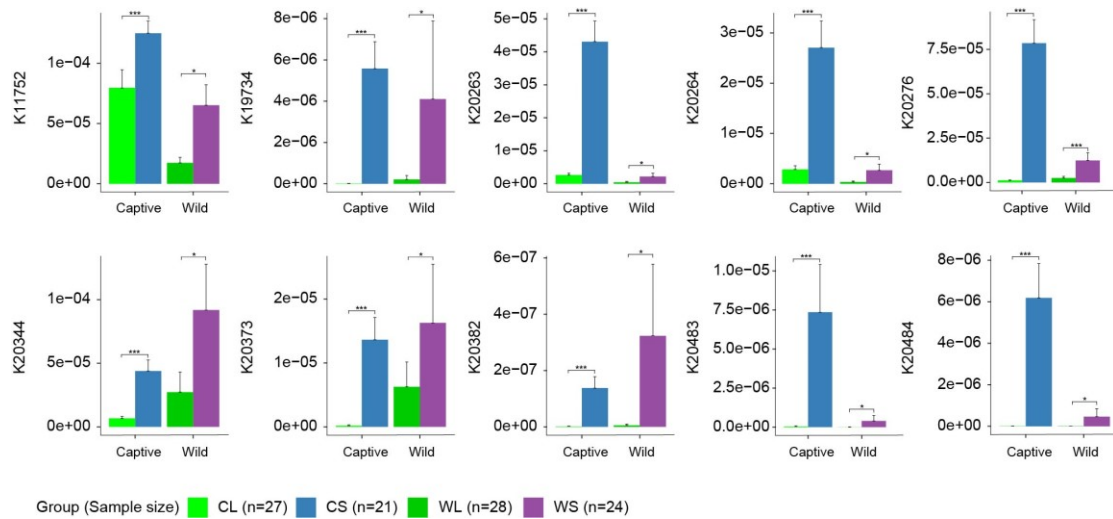

**Fig. S9. Seasonal differences of genes involved quorum sensing.** Only 10 KOs shared by wild and captive samples were shown. Two-tailed Wilcoxon rank-sum test was used to determine significance. \*  $0.01 < \text{FDR} < 0.05$ , \*\*\*  $\text{FDR} < 0.001$ .

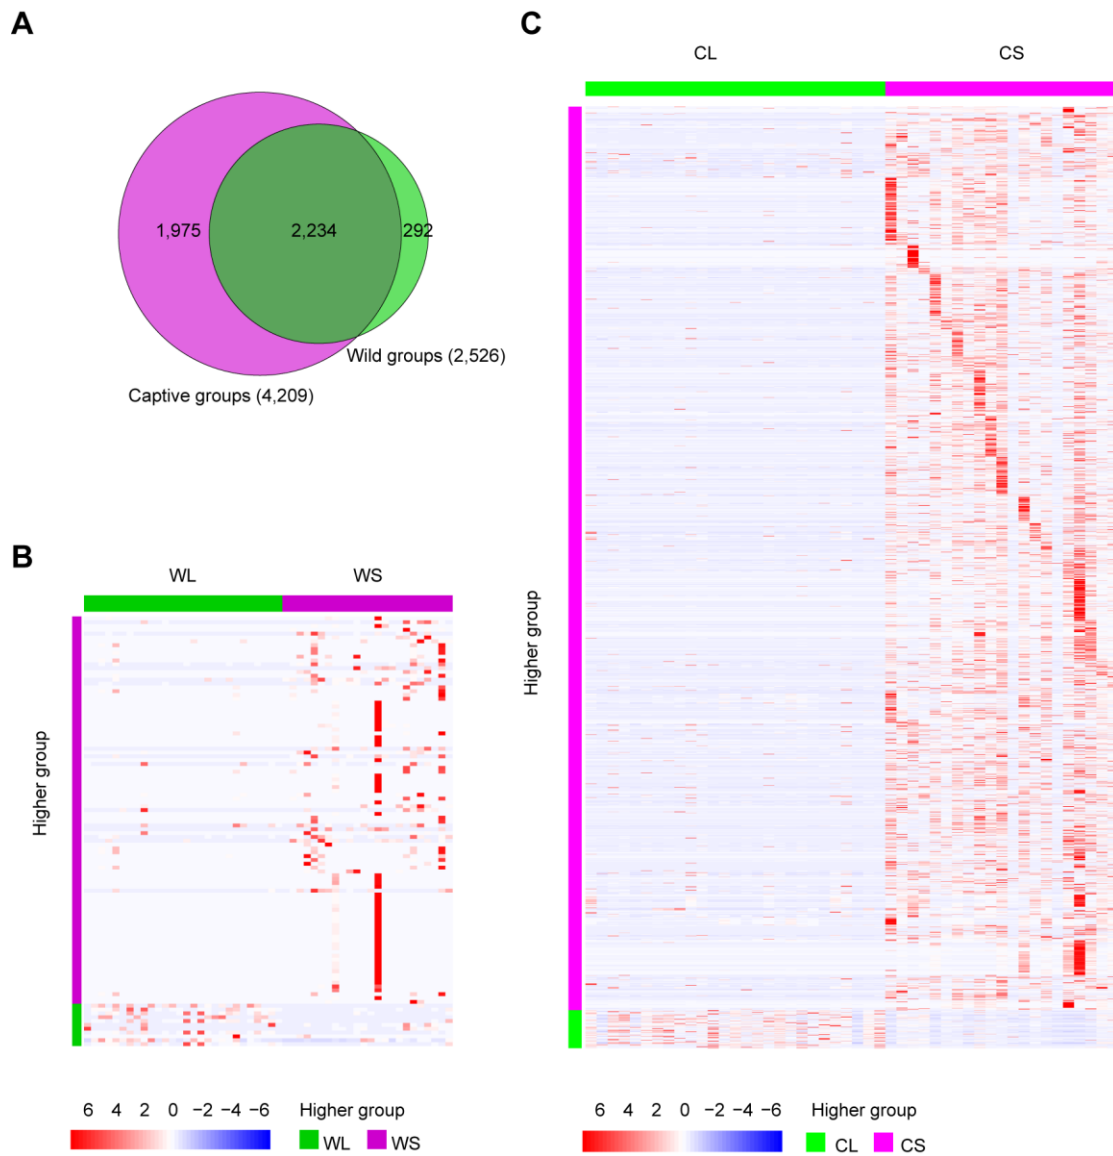

**Fig. S10. The seasonal differences of microbial virulence factors (VFs).** (A) Venn plot of genes annotated as VFs. (B-C) Heatmap of differential genes involving VFs between leaf season and shoot season in wild groups (B) and captive groups (C).

**Table S1 Dietary bamboos and habitual grouping information.**

| Group | Subgroup | Bamboo species                 | Bamboo part selected<br>by giant pandas | Source                 | Sample<br>size<br>(n) |
|-------|----------|--------------------------------|-----------------------------------------|------------------------|-----------------------|
| CL    | CL       | <i>Bashania fargesii</i>       | Leaf                                    | Captive (Chengdu base) | 3 *                   |
| CS    | CS_I     | <i>Pleiolastus amarus</i>      | Shoot                                   | Captive (Chengdu base) | 3 *                   |
|       | CS_II    | <i>Phyllostachys nidularia</i> | Shoot                                   | Captive (Chengdu base) | 3 *                   |
| WL    | WL       | <i>Bashania fargesii</i>       | Leaf                                    | Wild (Foping)          | 3 *                   |
| WS    | WS       | <i>Bashania fargesii</i>       | Shoot                                   | Wild (Foping)          | 3 *                   |

Chengdu base: Chengdu Research Base of Giant Panda Breeding. Foping: Foping National Natural Reserve. \*For both captive and wild dietary bamboos, 3 mixed samples went through extraction process for flavonoids determination. In captivity, one diet sample (about 5g fresh weight) was collected for each giant panda. For wild food bamboos, samples were collected from multiple sites where fresh droppings were collected.

**Table S2 All flavonoids detected in all sample types (dietary bamboos, feces and plasma).**

| Index   | Q1 (Da)  | Q3 (Da) MS only | Rt (min) | Molecular Weight (Da) | Ionization model | Compounds                              | Class     |
|---------|----------|-----------------|----------|-----------------------|------------------|----------------------------------------|-----------|
| mws4091 | 4.31E+02 | 3.11E+02        | 3.90E+00 | 4.32E+02              | [M-H]-           | Vitexin(Apigenin 8-C-glucoside)        | Flavone   |
| mws4092 | 4.47E+02 | 3.27E+02        | 3.58E+00 | 4.48E+02              | [M-H]-           | Orientin(Luteolin-8-C-glucoside)       | Flavone   |
| pma0214 | 4.79E+02 | 3.17E+02        | 3.91E+00 | 4.78E+02              | [M+H]+           | methylQuercetin O-hexoside             | Flavonol  |
| pma0249 | 4.79E+02 | 3.17E+02        | 3.52E+00 | 4.78E+02              | [M+H]+           | Selgin 5-O-hexoside                    | Flavone   |
| pma0724 | 4.35E+02 | 2.85E+02        | 3.79E+00 | 4.34E+02              | [M+H]+           | Naringenin C-hexoside                  | Flavanone |
| pma0787 | 5.51E+02 | 1.81E+02        | 4.63E+00 | 5.50E+02              | [M+H]+           | Quercetin-3-(6"-malonyl)-<br>Glucoside | Flavonol  |
| pma0791 | 5.21E+02 | 2.73E+02        | 4.50E+00 | 5.20E+02              | [M+H]+           | Naringenin O-malonylhexoside           | Flavanone |
| pma0795 | 5.51E+02 | 3.03E+02        | 4.56E+00 | 5.50E+02              | [M+H]+           | Tricetin O-malonylhexoside             | Flavone   |
| pma1108 | 4.33E+02 | 2.83E+02        | 3.78E+00 | 4.32E+02              | [M+H]+           | Apigenin C-glucoside                   | Flavone   |

|         |          |          |          |          |                    |                                                        |           |
|---------|----------|----------|----------|----------|--------------------|--------------------------------------------------------|-----------|
| pma1116 | 3.01E+02 | 2.86E+02 | 4.13E+00 | 3.00E+02 | [M+H] <sup>+</sup> | Kaempferide                                            | Flavonol  |
| pma6218 | 4.19E+02 | 3.83E+02 | 3.84E+00 | 4.18E+02 | [M+H] <sup>+</sup> | O-methylnaringenin C-pentoside                         | Flavanone |
| pma6229 | 4.51E+02 | 3.31E+02 | 3.37E+00 | 4.50E+02 | [M+H] <sup>+</sup> | Eriodictyol C-hexoside                                 | Flavanone |
| pma6371 | 6.11E+02 | 4.73E+02 | 3.08E+00 | 6.10E+02 | [M+H] <sup>+</sup> | "di-C,C-hexosyl-luteolin"                              | Flavone   |
| pma6389 | 3.45E+02 | 1.77E+02 | 6.33E+00 | 3.44E+02 | [M+H] <sup>+</sup> | Ayanin                                                 | Flavonol  |
| pma6520 | 8.36E+02 | 3.31E+02 | 4.21E+00 | 8.35E+02 | [M+H] <sup>+</sup> | Tricin 4'-O-(β-guaiacylglyceryl)<br>ether-O-rutinoside | Flavone   |
| pma6638 | 4.77E+02 | 3.15E+02 | 5.30E+00 | 4.76E+02 | [M+H] <sup>+</sup> | O-methylChrysoeriol 7-O-<br>hexoside                   | Flavone   |
| pmb0378 | 6.25E+02 | 1.77E+02 | 4.47E+00 | 6.24E+02 | [M+H] <sup>+</sup> | Luteolin O-feruloylhexoside                            | Flavone   |
| pmb0565 | 5.09E+02 | 3.47E+02 | 3.41E+00 | 5.08E+02 | [M+H] <sup>+</sup> | Syringetin 3-O-hexoside                                | Flavonol  |
| pmb0569 | 5.09E+02 | 3.47E+02 | 4.17E+00 | 5.08E+02 | [M+H] <sup>+</sup> | Syringetin 5-O-hexoside                                | Flavonol  |

|         |          |          |          |          |                    |                                  |           |
|---------|----------|----------|----------|----------|--------------------|----------------------------------|-----------|
| pmb0576 | 5.19E+02 | 2.71E+02 | 4.23E+00 | 5.18E+02 | [M+H] <sup>+</sup> | Apigenin O-malonylhexoside       | Flavone   |
| pmb0595 | 4.79E+02 | 3.17E+02 | 4.17E+00 | 4.78E+02 | [M+H] <sup>+</sup> | Isorhamnetin 5-O-hexoside        | Flavonol  |
| pmb0607 | 4.63E+02 | 3.01E+02 | 4.30E+00 | 4.62E+02 | [M+H] <sup>+</sup> | Chrysoeriol 7-O-hexoside         | Flavone   |
| pmb0608 | 5.49E+02 | 3.01E+02 | 4.55E+00 | 5.48E+02 | [M+H] <sup>+</sup> | Chrysoeriol O-malonylhexoside    | Flavone   |
| pmb0622 | 6.11E+02 | 4.73E+02 | 3.09E+00 | 6.10E+02 | [M+H] <sup>+</sup> | C-hexosyl-luteolin O-hexoside    | Flavone   |
| pmb0624 | 6.11E+02 | 4.31E+02 | 3.09E+00 | 6.10E+02 | [M+H] <sup>+</sup> | 6-C-hexosyl-luteolin O-hexoside  | Flavone   |
| pmb0628 | 6.13E+02 | 4.51E+02 | 3.09E+00 | 6.12E+02 | [M+H] <sup>+</sup> | Eriodictiol C-hexosyl-O-hexoside | Flavanone |
| pmb0631 | 5.81E+02 | 5.15E+02 | 3.17E+00 | 5.80E+02 | [M+H] <sup>+</sup> | C-hexosyl-luteolin C-pentoside   | Flavone   |
| pmb0636 | 5.81E+02 | 4.31E+02 | 3.18E+00 | 5.80E+02 | [M+H] <sup>+</sup> | 6-C-hexosyl luteolin O-pentoside | Flavone   |
| pmb0647 | 5.81E+02 | 4.19E+02 | 3.46E+00 | 5.80E+02 | [M+H] <sup>+</sup> | 8-C-hexosyl-luteolin O-pentoside | Flavone   |
| pmb0652 | 5.65E+02 | 4.33E+02 | 3.60E+00 | 5.64E+02 | [M+H] <sup>+</sup> | C-hexosyl-apigenin O-pentoside   | Flavone   |
| pmb0653 | 5.95E+02 | 4.63E+02 | 3.68E+00 | 5.94E+02 | [M+H] <sup>+</sup> | "di-C,C-hexosyl-apigenin"        | Flavone   |



|         |          |          |          |          |                    |                                                     |           |
|---------|----------|----------|----------|----------|--------------------|-----------------------------------------------------|-----------|
| pmb0661 | 6.09E+02 | 4.63E+02 | 3.87E+00 | 6.08E+02 | [M+H] <sup>+</sup> | Chrysoeriol C-hexosyl-O-rhamnoside                  | Flavone   |
| pmb0673 | 4.03E+02 | 3.67E+02 | 4.30E+00 | 4.02E+02 | [M+H] <sup>+</sup> | Apigenin 6-C-pentoside                              | Flavone   |
| pmb0681 | 4.03E+02 | 3.67E+02 | 4.32E+00 | 4.02E+02 | [M+H] <sup>+</sup> | Apigenin 8-C-pentoside                              | Flavone   |
| pmb0686 | 5.37E+02 | 2.89E+02 | 4.41E+00 | 5.36E+02 | [M+H] <sup>+</sup> | Eriodictyol O-malonylhexoside                       | Flavanone |
| pmb0689 | 4.63E+02 | 3.31E+02 | 4.75E+00 | 4.62E+02 | [M+H] <sup>+</sup> | Chrysoeriol C-hexoside                              | Flavone   |
| pmb0693 | 5.65E+02 | 4.33E+02 | 3.39E+00 | 5.64E+02 | [M+H] <sup>+</sup> | C-hexosyl-apigenin C-pentoside                      | Flavone   |
| pmb0701 | 4.63E+02 | 3.13E+02 | 3.89E+00 | 4.62E+02 | [M+H] <sup>+</sup> | Chrysoeriol 8-C-hexoside                            | Flavone   |
| pmb0712 | 6.55E+02 | 3.31E+02 | 3.50E+00 | 6.54E+02 | [M+H] <sup>+</sup> | Tricin 5-O-hexosyl-O-hexoside                       | Flavone   |
| pmb0713 | 6.55E+02 | 3.31E+02 | 3.37E+00 | 6.54E+02 | [M+H] <sup>+</sup> | Tricin 7-O-hexosyl-O-hexoside                       | Flavone   |
| pmb0714 | 6.89E+02 | 3.31E+02 | 4.01E+00 | 6.88E+02 | [M+H] <sup>+</sup> | Tricin 4'-O-(β-guaiacylglyceryl) ether 5-O-hexoside | Flavone   |

|         |          |          |          |          |                    |                                                   |         |
|---------|----------|----------|----------|----------|--------------------|---------------------------------------------------|---------|
| pmb0717 | 5.27E+02 | 3.31E+02 | 4.11E+00 | 5.26E+02 | [M+H] <sup>+</sup> | Tricin 5-O-β-guaiacylglycerol                     | Flavone |
| pmb0723 | 6.89E+02 | 3.31E+02 | 4.97E+00 | 6.88E+02 | [M+H] <sup>+</sup> | Tricin 4'-O-(β-guaiacylglyceryl) ether O-hexoside | Flavone |
| pmb0724 | 4.77E+02 | 3.31E+02 | 4.99E+00 | 4.76E+02 | [M+H] <sup>+</sup> | Tricin O-rhamnoside                               | Flavone |
| pmb0725 | 6.69E+02 | 3.31E+02 | 5.10E+00 | 6.68E+02 | [M+H] <sup>+</sup> | Tricin 7-O-feruloylhexoside                       | Flavone |
| pmb0733 | 6.39E+02 | 3.31E+02 | 4.07E+00 | 6.38E+02 | [M+H] <sup>+</sup> | Tricin 5-O-rutinoside                             | Flavone |
| pmb0735 | 5.07E+02 | 3.31E+02 | 4.18E+00 | 5.06E+02 | [M+H] <sup>+</sup> | Tricin O-glucuronic acid                          | Flavone |
| pmb0736 | 4.93E+02 | 3.31E+02 | 4.30E+00 | 4.92E+02 | [M+H] <sup>+</sup> | Tricin 7-O-hexoside                               | Flavone |
| pmb0738 | 6.99E+02 | 3.31E+02 | 4.88E+00 | 6.98E+02 | [M+H] <sup>+</sup> | Tricin O-sinapoylhexoside                         | Flavone |
| pmb0739 | 6.59E+02 | 3.31E+02 | 4.92E+00 | 6.58E+02 | [M+H] <sup>+</sup> | Tricin O-hexosyl-O-syringin alcohol               | Flavone |
| pmb0743 | 5.27E+02 | 3.48E+02 | 5.44E+00 | 5.26E+02 | [M+H] <sup>+</sup> | Tricin 7-O-β-guaiacylglycerol                     | Flavone |

|         |          |          |          |          |                    |                                                               |         |
|---------|----------|----------|----------|----------|--------------------|---------------------------------------------------------------|---------|
| pmb0744 | 4.35E+02 | 3.31E+02 | 5.48E+00 | 4.34E+02 | [M+H] <sup>+</sup> | Tricin O-phenylformic acid                                    | Flavone |
| pmb0745 | 4.97E+02 | 3.31E+02 | 5.75E+00 | 4.96E+02 | [M+H] <sup>+</sup> | Tricin 4'-O-syringyl alcohol                                  | Flavone |
| pmb0746 | 5.27E+02 | 3.31E+02 | 5.84E+00 | 5.26E+02 | [M+H] <sup>+</sup> | Tricin 4'-O-β-guaiacylglycerol                                | Flavone |
| pmb1270 | 8.52E+02 | 3.31E+02 | 4.04E+00 | 8.51E+02 | [M+H] <sup>+</sup> | Tricin 4'-O-(β-guaiacylglyceryl) ether 5-O-hexosyl-O-hexoside | Flavone |
| pmb1312 | 6.89E+02 | 3.31E+02 | 4.43E+00 | 6.88E+02 | [M+H] <sup>+</sup> | Tricin 4'-O-(β-guaiacylglyceryl) ether 7-O-hexoside           | Flavone |
| pmb1466 | 5.11E+02 | 3.31E+02 | 6.38E+00 | 5.10E+02 | [M+H] <sup>+</sup> | Tricin 4'-O-syringic acid                                     | Flavone |
| pmb2850 | 3.29E+02 | 3.14E+02 | 5.73E+00 | 3.30E+02 | [M-H] <sup>-</sup> | Tricin                                                        | Flavone |
| pmb2999 | 4.61E+02 | 2.99E+02 | 3.87E+00 | 4.62E+02 | [M-H] <sup>-</sup> | Chrysoeriol 5-O-hexoside                                      | Flavone |
| pmb3024 | 4.47E+02 | 3.27E+02 | 3.45E+00 | 4.48E+02 | [M-H] <sup>-</sup> | Luteolin C-hexoside                                           | Flavone |
| pmb3028 | 5.35E+02 | 4.91E+02 | 3.75E+00 | 5.36E+02 | [M-H] <sup>-</sup> | Tricin O-sinapic acid                                         | Flavone |

|         |          |          |          |          |        |                                                   |            |
|---------|----------|----------|----------|----------|--------|---------------------------------------------------|------------|
| pmb3032 | 5.61E+02 | 3.29E+02 | 5.69E+00 | 5.62E+02 | [M-H]- | Tricin O-malonyl rhamnoside                       | Flavone    |
| pmb3041 | 5.21E+02 | 3.29E+02 | 3.81E+00 | 5.22E+02 | [M-H]- | Tricin O-saccharic acid                           | Flavone    |
| pmb3042 | 4.91E+02 | 3.29E+02 | 4.00E+00 | 4.92E+02 | [M-H]- | Tricin 5-O-hexoside                               | Flavone    |
| pmb3047 | 6.57E+02 | 4.95E+02 | 4.50E+00 | 6.58E+02 | [M-H]- | Tricin 4'-O-(syringyl alcohol) ether 5-O-hexoside | Flavone    |
| pme0355 | 2.55E+02 | 1.37E+02 | 4.97E+00 | 2.54E+02 | [M+H]+ | Daidzein                                          | Isoflavone |
| pme0364 | 3.01E+02 | 2.86E+02 | 5.77E+00 | 3.00E+02 | [M+H]+ | Chrysoeriol                                       | Flavone    |
| pme0377 | 2.73E+02 | 1.53E+02 | 5.59E+00 | 2.72E+02 | [M+H]+ | Naringenin                                        | Flavanone  |
| pme0379 | 2.71E+02 | 1.53E+02 | 5.63E+00 | 2.70E+02 | [M+H]+ | Apigenin                                          | Flavone    |
| pme0426 | 1.23E+02 | 1.08E+02 | 4.05E+00 | 1.24E+02 | [M-H]- | 4-Methylcatechol                                  | Polyphenol |
| pme1502 | 3.15E+02 | 3.00E+02 | 7.23E+00 | 3.14E+02 | [M+H]+ | Kumatakenin                                       | Flavonol   |
| pme1518 | 4.03E+02 | 3.73E+02 | 7.06E+00 | 4.02E+02 | [M+H]+ | Nobiletin                                         | Flavone    |

|         |          |          |          |          |                    |                                             |            |
|---------|----------|----------|----------|----------|--------------------|---------------------------------------------|------------|
| pme1550 | 3.73E+02 | 3.43E+02 | 7.54E+00 | 3.72E+02 | [M+H] <sup>+</sup> | Tangeretin                                  | Flavone    |
| pme1568 | 2.85E+02 | 2.57E+02 | 5.08E+00 | 2.86E+02 | [M-H] <sup>-</sup> | "Orobol (5,7,3',4'-tetrahydroxyisoflavone)" | Isoflavone |
| pme1578 | 2.71E+02 | 2.15E+02 | 5.52E+00 | 2.70E+02 | [M+H] <sup>+</sup> | "Genistein (4',5,7-Trihydroxyisoflavone)"   | Isoflavone |
| pme1580 | 2.87E+02 | 1.35E+02 | 5.05E+00 | 2.88E+02 | [M-H] <sup>-</sup> | Eriodictyol                                 | Flavanone  |
| pme1588 | 3.15E+02 | 1.51E+02 | 5.85E+00 | 3.16E+02 | [M-H] <sup>-</sup> | Isorhamnetin                                | Flavonol   |
| pme1598 | 4.63E+02 | 3.01E+02 | 3.85E+00 | 4.64E+02 | [M-H] <sup>-</sup> | Hesperetin 5-O-glucoside                    | Flavanone  |
| pme1600 | 3.03E+02 | 1.67E+02 | 6.28E+00 | 3.02E+02 | [M+H] <sup>+</sup> | 7-O-Methyleriodictyol                       | Flavanone  |
| pme1824 | 1.53E+02 | 1.09E+02 | 2.48E+00 | 1.54E+02 | [M-H] <sup>-</sup> | Protocatechuic acid                         | Polyphenol |
| pme2482 | 1.39E+02 | 9.28E+01 | 3.03E+00 | 1.38E+02 | [M+H] <sup>+</sup> | Protocatechuic aldehyde                     | Polyphenol |
| pme2954 | 3.03E+02 | 1.53E+02 | 5.13E+00 | 3.02E+02 | [M+H] <sup>+</sup> | Quercetin                                   | Flavonol   |

|         |          |          |          |          |        |                                            |            |
|---------|----------|----------|----------|----------|--------|--------------------------------------------|------------|
| pme2957 | 2.71E+02 | 1.51E+02 | 5.57E+00 | 2.72E+02 | [M-H]- | Naringenin chalcone                        | Chalcone   |
| pme3137 | 2.39E+02 | 1.65E+02 | 7.73E+00 | 2.38E+02 | [M+H]+ | 3-Hydroxyflavone                           | Flavone    |
| pme3230 | 2.83E+02 | 2.68E+02 | 5.00E+00 | 2.84E+02 | [M-H]- | Calycosin                                  | Isoflavone |
| pme3282 | 2.73E+02 | 2.29E+02 | 3.40E+00 | 2.74E+02 | [M-H]- | "Afzelechin (3,5,7,4'-Tetrahydroxyflavan)" | Flavanonol |
| pme3292 | 2.83E+02 | 2.68E+02 | 6.97E+00 | 2.84E+02 | [M-H]- | Prunetin                                   | Isoflavone |
| pme3464 | 2.85E+02 | 1.64E+02 | 6.98E+00 | 2.86E+02 | [M-H]- | Isosakuranetin (4'-Methylnaringenin)       | Flavanone  |
| pme3473 | 2.71E+02 | 1.51E+02 | 5.59E+00 | 2.72E+02 | [M-H]- | Butin                                      | Flavanone  |
| pmf0011 | 5.93E+02 | 4.73E+02 | 3.19E+00 | 5.94E+02 | [M-H]- | "Apigenin 6,8-C-diglucoside"               | Flavone    |
| pmf0012 | 5.95E+02 | 4.57E+02 | 3.18E+00 | 5.94E+02 | [M+H]+ | "6,8-di-C-glucoside Apigenine"             | Flavone    |
| pmf0057 | 2.71E+02 | 1.51E+02 | 5.66E+00 | 2.72E+02 | [M-H]- | "4,2',4',6'-Tetrahydroxychalcone           | Chalcone   |

|         |          |          |          |          |        |                              |            |
|---------|----------|----------|----------|----------|--------|------------------------------|------------|
|         |          |          |          |          |        | "                            |            |
| pmf0058 | 2.71E+02 | 1.51E+02 | 5.66E+00 | 2.72E+02 | [M-H]- | "4',5,7-Trihydroxyflavanone" | Flavanone  |
| pmf0179 | 6.23E+02 | 3.15E+02 | 4.04E+00 | 6.24E+02 | [M-H]- | Narcissoside                 | Flavonol   |
| pmf0204 | 4.65E+02 | 3.03E+02 | 3.73E+00 | 4.64E+02 | [M+H]+ | Hyperoside                   | Flavonol   |
| pmf0208 | 4.65E+02 | 3.03E+02 | 3.90E+00 | 4.64E+02 | [M+H]+ | Isoquercitroside             | Flavonol   |
| pmf0375 | 4.79E+02 | 3.17E+02 | 4.18E+00 | 4.78E+02 | [M+H]+ | Isorhamnetin 3-O-glucoside   | Flavonol   |
| pmf0417 | 5.95E+02 | 2.87E+02 | 3.70E+00 | 5.96E+02 | [M-H]- | Eriocitrin                   | Flavanone  |
| pmf0548 | 5.63E+02 | 3.53E+02 | 3.34E+00 | 5.96E+02 | [M-H]- | Schaftoside                  | Flavone    |
| pmf0549 | 6.07E+02 | 2.99E+02 | 4.14E+00 | 6.08E+02 | [M-H]- | Diosmin                      | Flavone    |
| pmf0567 | 2.99E+02 | 2.11E+02 | 5.72E+00 | 3.00E+02 | [M-H]- | Tectorigenin                 | Isoflavone |
| pma6499 | 5.09E+02 | 3.47E+02 | 3.41E+00 | 5.08E+02 | [M+H]+ | Limocitrin O-hexoside        | Flavonol   |
| pmb0277 | 3.31E+02 | 3.15E+02 | 5.74E+00 | 3.30E+02 | [M+H]+ | Tricin                       | Flavone    |

|         |          |          |          |          |                    |                                                |          |
|---------|----------|----------|----------|----------|--------------------|------------------------------------------------|----------|
| pmb0602 | 5.09E+02 | 3.47E+02 | 4.17E+00 | 5.08E+02 | [M+H] <sup>+</sup> | Syringetin 7-O-hexoside                        | Flavonol |
| pmb0613 | 7.57E+02 | 5.77E+02 | 2.68E+00 | 7.56E+02 | [M+H] <sup>+</sup> | Apigenin 6-C-hexosyl-8-C-hexosyl-O-hexoside    | Flavone  |
| pmb0644 | 4.49E+02 | 2.99E+02 | 3.45E+00 | 4.48E+02 | [M+H] <sup>+</sup> | Luteolin C-hexoside                            | Flavone  |
| pmb0674 | 6.85E+02 | 3.68E+02 | 4.10E+00 | 6.84E+02 | [M+H] <sup>+</sup> | C-pentosyl apigenin O-salicyloyl hexoside      | Flavone  |
| pmb0711 | 6.11E+02 | 3.03E+02 | 3.70E+00 | 6.10E+02 | [M+H] <sup>+</sup> | Quercetin 7-O-rutinoside                       | Flavonol |
| pmb1108 | 7.73E+02 | 5.93E+02 | 2.66E+00 | 7.72E+02 | [M+H] <sup>+</sup> | Luteolin 6-C-hexoside 8-C-hexosyl-O-hexoside   | Flavone  |
| pmb3039 | 7.03E+02 | 3.29E+02 | 5.99E+00 | 7.04E+02 | [M-H] <sup>-</sup> | Tricin O-oxalic acid O-coumaroyl shikimic acid | Flavone  |
| pmb3043 | 6.37E+02 | 3.29E+02 | 4.07E+00 | 6.38E+02 | [M-H] <sup>-</sup> | Tricin 5-O-rutinoside                          | Flavone  |



|         |          |          |          |          |        |                                  |            |
|---------|----------|----------|----------|----------|--------|----------------------------------|------------|
| pmb3052 | 5.25E+02 | 3.29E+02 | 5.84E+00 | 5.26E+02 | [M-H]- | Tricin 4'-O-β-guaiacylglycerol   | Flavone    |
| pmb3894 | 3.29E+02 | 2.29E+02 | 5.91E+00 | 3.30E+02 | [M-H]- | Di-O-methylquercetin             | Flavonol   |
| pme0197 | 6.09E+02 | 3.01E+02 | 3.70E+00 | 6.10E+02 | [M-H]- | Quercetin 3-O-rutinoside (Rutin) | Flavonol   |
| pme1583 | 2.89E+02 | 1.53E+02 | 5.05E+00 | 2.88E+02 | [M+H]+ | Eriodictyol                      | Flavanone  |
| pme2478 | 1.37E+02 | 1.08E+02 | 3.06E+00 | 1.38E+02 | [M-H]- | Protocatechuic aldehyde          | Polyphenol |
| pme2960 | 2.73E+02 | 1.53E+02 | 5.57E+00 | 2.72E+02 | [M+H]+ | Naringenin chalcone              | Chalcone   |
| pme3134 | 2.37E+02 | 2.09E+02 | 7.73E+00 | 2.38E+02 | [M-H]- | 3-Hydroxyflavone                 | Flavone    |
| pmf0374 | 4.77E+02 | 3.14E+02 | 4.19E+00 | 4.78E+02 | [M-H]- | Isorhamnetin 3-O-glucoside       | Flavonol   |
| pmf0550 | 6.09E+02 | 3.01E+02 | 4.15E+00 | 6.08E+02 | [M+H]+ | Diosmin                          | Flavone    |

**Table S3 Qualitative determination of all flavonoids**

| Index   | Compounds                              | Class     | WL   |       | WS   |       | CL   |       |        | CS_I |       |        | CS_II |       |        | Flavonoids additive <i>in vitro</i> culture |
|---------|----------------------------------------|-----------|------|-------|------|-------|------|-------|--------|------|-------|--------|-------|-------|--------|---------------------------------------------|
|         |                                        |           | Diet | Feces | Diet | Feces | Diet | Feces | Plasma | Diet | Feces | Plasma | Diet  | Feces | Plasma |                                             |
| mws4091 | Vitexin(Apigenin 8-C-glucoside)        | Flavone   | +    | +     | -    | +     | +    | +     | -      | +    | +     | -      | -     | +     | -      | +                                           |
| mws4092 | Orientin(luteolin 8-C-glucoside)       | Flavone   | +    | +     | -    | -     | +    | +     | +      | -    | -     | +      | -     | -     | -      | +                                           |
| pma0214 | methylQuercetin O-hexoside             | Flavonol  | +    | +     | +    | +     | +    | +     | -      | +    | +     | -      | +     | +     | -      | +                                           |
| pma0249 | Selgin 5-O-hexoside                    | Flavone   | +    | +     | -    | +     | +    | +     | -      | -    | -     | -      | -     | -     | -      | +                                           |
| pma0724 | Naringenin C-hexoside                  | Flavanone | +    | +     | -    | +     | +    | +     | -      | +    | +     | -      | -     | -     | -      | +                                           |
| pma0787 | Quercetin-3-(6"-malonyl)-<br>Glucoside | Flavonol  | -    | +     | -    | -     | -    | +     | -      | -    | -     | -      | -     | -     | -      | -                                           |
| pma0791 | Naringenin O-malonylhexoside           | Flavanone | +    | +     | +    | +     | +    | +     | -      | +    | +     | -      | +     | -     | -      | -                                           |
| pma0795 | Tricetin O-malonylhexoside             | Flavone   | +    | +     | +    | +     | +    | +     | -      | -    | -     | -      | -     | -     | -      | -                                           |

|         |                                                                |           |   |   |   |   |   |   |   |   |   |   |   |   |   |   |
|---------|----------------------------------------------------------------|-----------|---|---|---|---|---|---|---|---|---|---|---|---|---|---|
| pma1108 | Apigenin C-glucoside                                           | Flavone   | + | + | + | + | + | + | - | + | + | - | - | + | - | + |
| pma1116 | Kaempferide                                                    | Flavonol  | + | + | + | + | + | + | - | + | + | - | - | + | - | + |
| pma6218 | O-methylnaringenin C-pentoside                                 | Flavanone | + | + | - | - | + | + | - | - | + | - | - | + | - | - |
| pma6229 | Eriodictyol C-hexoside                                         | Flavanone | + | + | - | + | + | + | - | - | + | - | - | + | - | - |
| pma6371 | "di-C,C-hexosyl-luteolin"                                      | Flavone   | + | + | + | - | + | + | - | - | + | - | - | - | - | + |
| pma6389 | Ayanin                                                         | Flavonol  | + | + | + | + | + | + | - | + | + | - | + | + | - | - |
| pma6499 | Limocitrin O-hexoside                                          | Flavonol  | + | - | - | - | + | - | - | - | - | - | + | - | - | - |
| pma6520 | Tricin 4'-O-( $\beta$ -guaiacylglyceryl)<br>ether-O-rutinoside | Flavone   | + | + | - | - | + | + | - | - | + | - | - | - | - | - |
| pma6638 | O-methylChrysoeriol 7-O-<br>hexoside                           | Flavone   | + | + | - | - | + | + | - | - | + | - | - | - | - | + |
| pmb0277 | Tricin                                                         | Flavone   | + | - | - | - | + | - | + | + | - | + | - | - | + | + |

|         |                                             |          |   |   |   |   |   |   |   |   |   |   |   |   |   |   |
|---------|---------------------------------------------|----------|---|---|---|---|---|---|---|---|---|---|---|---|---|---|
| pmb0378 | Luteolin O-feruloylhexoside                 | Flavone  | + | + | - | - | + | + | - | - | + | - | - | - | - | - |
| pmb0565 | Syringetin 3-O-hexoside                     | Flavonol | + | + | - | - | + | + | - | - | - | - | - | - | - | - |
| pmb0569 | Syringetin 5-O-hexoside                     | Flavonol | + | + | + | + | + | + | - | + | - | - | + | + | - | - |
| pmb0576 | Apigenin O-malonylhexoside                  | Flavone  | + | + | + | + | + | + | - | + | + | - | + | + | - | - |
| pmb0595 | Isorhamnetin 5-O-hexoside                   | Flavonol | + | + | + | + | + | + | - | + | + | - | + | + | - | + |
| pmb0602 | Syringetin 7-O-hexoside                     | Flavonol | + | - | + | - | + | - | - | + | - | - | + | - | - | - |
| pmb0607 | Chrysoeriol 7-O-hexoside                    | Flavone  | + | + | - | + | + | + | - | + | + | - | - | + | - | + |
| pmb0608 | Chrysoeriol O-malonylhexoside               | Flavone  | + | + | + | + | + | + | - | + | + | - | - | - | - | + |
| pmb0613 | Apigenin 6-C-hexosyl-8-C-hexosyl-O-hexoside | Flavone  | + | - | - | - | - | - | - | - | - | - | - | - | - | - |
| pmb0622 | C-hexosyl-luteolin O-hexoside               | Flavone  | + | + | + | - | + | + | - | - | + | - | - | - | - | + |
| pmb0624 | 6-C-hexosyl-luteolin O-hexoside             | Flavone  | + | + | - | - | + | + | + | + | + | - | + | - | - | + |

|         |                                           |           |   |   |   |   |   |   |   |   |   |   |   |   |   |   |
|---------|-------------------------------------------|-----------|---|---|---|---|---|---|---|---|---|---|---|---|---|---|
| pmb0628 | Eriodictiol C-hexosyl-O-hexoside          | Flavanone | + | + | - | - | + | + | + | - | - | - | + | - | - | - |
| pmb0631 | C-hexosyl-luteolin C-pentoside            | Flavone   | + | + | - | - | + | + | - | - | + | - | - | - | - | - |
| pmb0636 | 6-C-hexosyl luteolin O-pentoside          | Flavone   | + | + | - | - | + | + | - | - | + | - | - | - | - | - |
| pmb0644 | Luteolin C-hexoside                       | Flavone   | + | - | - | - | + | - | - | - | - | - | - | - | - | + |
| pmb0647 | 8-C-hexosyl-luteolin O-pentoside          | Flavone   | + | + | + | - | + | + | - | + | + | - | - | - | - | + |
| pmb0652 | C-hexosyl-apigenin O-pentoside            | Flavone   | + | + | - | - | + | + | - | - | + | - | - | - | - | + |
| pmb0653 | "di-C,C-hexosyl-apigenin"                 | Flavone   | - | - | - | - | - | + | - | - | + | - | - | + | - | + |
| pmb0661 | Chrysoeriol C-hexosyl-O-rhamnoside        | Flavone   | + | + | - | + | + | + | + | - | + | + | - | + | - | + |
| pmb0673 | Apigenin 6-C-pentoside                    | Flavone   | - | + | - | - | + | + | - | - | + | - | - | - | - | - |
| pmb0674 | C-pentosyl apigenin O-salicyloyl hexoside | Flavone   | - | - | - | - | - | - | - | - | - | - | - | - | - | - |

|         |                                                                |           |   |   |   |   |   |   |   |   |   |   |   |   |   |   |
|---------|----------------------------------------------------------------|-----------|---|---|---|---|---|---|---|---|---|---|---|---|---|---|
| pmb0681 | Apigenin 8-C-pentoside                                         | Flavone   | + | + | - | - | + | + | - | + | + | - | + | - | - | + |
| pmb0686 | Eriodictyol O-malonylhexoside                                  | Flavanone | + | + | - | + | + | + | - | - | + | - | - | - | - | - |
| pmb0689 | Chrysoeriol C-hexoside                                         | Flavone   | + | + | - | - | + | + | - | + | + | - | - | - | - | + |
| pmb0693 | C-hexosyl-apigenin C-pentoside                                 | Flavone   | + | + | - | + | + | + | - | + | + | - | - | + | - | + |
| pmb0701 | Chrysoeriol 8-C-hexoside                                       | Flavone   | + | + | - | + | + | + | - | - | + | - | - | + | - | - |
| pmb0711 | Quercetin 7-O-rutinoside                                       | Flavonol  | - | - | + | - | + | - | - | - | - | - | + | - | - | + |
| pmb0712 | Tricin 5-O-hexosyl-O-hexoside                                  | Flavone   | + | + | - | - | + | + | - | + | + | - | + | + | - | + |
| pmb0713 | Tricin 7-O-hexosyl-O-hexoside                                  | Flavone   | + | + | + | + | + | + | - | + | + | - | + | + | - | + |
| pmb0714 | Tricin 4'-O-( $\beta$ -guaiacylglyceryl)<br>ether 5-O-hexoside | Flavone   | + | + | - | + | + | + | - | - | + | - | - | + | - | + |
| pmb0717 | Tricin 5-O- $\beta$ -guaiacylglycerol                          | Flavone   | + | + | - | + | + | + | - | + | + | - | - | + | - | + |

|         |                                                           |         |   |   |   |   |   |   |   |   |   |   |   |   |   |   |
|---------|-----------------------------------------------------------|---------|---|---|---|---|---|---|---|---|---|---|---|---|---|---|
| pmb0723 | Tricin 4'-O-( $\beta$ -guaiacylglyceryl) ether O-hexoside | Flavone | + | + | - | + | + | + | - | + | + | - | + | + | - | - |
| pmb0724 | Tricin O-rhamnoside                                       | Flavone | + | + | - | - | + | + | - | - | - | - | - | - | - | + |
| pmb0725 | Tricin 7-O-feruloylhexoside                               | Flavone | + | + | - | + | + | + | - | - | + | - | - | - | - | - |
| pmb0733 | Tricin 5-O-rutinoside                                     | Flavone | - | + | - | + | - | + | - | - | + | - | - | + | - | - |
| pmb0735 | Tricin O-glucuronic acid                                  | Flavone | - | + | - | + | - | + | - | - | + | - | - | + | - | - |
| pmb0736 | Tricin 7-O-hexoside                                       | Flavone | + | + | - | - | + | + | - | + | + | - | - | + | - | + |
| pmb0738 | Tricin O-sinapoylhexoside                                 | Flavone | + | + | - | - | + | + | - | + | + | - | - | + | - | - |
| pmb0739 | Tricin O-hexosyl-O-syringin alcohol                       | Flavone | + | + | - | - | + | + | - | - | - | - | - | - | - | - |
| pmb0743 | Tricin 7-O- $\beta$ -guaiacylglycerol                     | Flavone | + | + | - | - | + | + | - | - | - | - | - | - | - | - |
| pmb0744 | Tricin O-phenylformic acid                                | Flavone | + | + | + | + | + | + | - | + | + | - | + | + | - | - |

|         |                                                                       |         |   |   |   |   |   |   |   |   |   |   |   |   |   |   |
|---------|-----------------------------------------------------------------------|---------|---|---|---|---|---|---|---|---|---|---|---|---|---|---|
| pmb0745 | Tricin 4'-O-syringyl alcohol                                          | Flavone | + | + | + | + | + | + | - | + | + | - | + | + | - | + |
| pmb0746 | Tricin 4'-O- $\beta$ -guaiacylglycerol                                | Flavone | - | + | - | + | - | + | + | - | + | - | - | + | - | - |
| pmb1108 | Luteolin 6-C-hexoside 8-C-hexosyl-O-hexoside                          | Flavone | + | - | - | - | + | - | - | - | - | - | - | - | - | - |
| pmb1270 | Tricin 4'-O-( $\beta$ -guaiacylglyceryl) ether 5-O-hexosyl-O-hexoside | Flavone | + | + | - | - | + | + | - | - | - | - | - | - | - | - |
| pmb1312 | Tricin 4'-O-( $\beta$ -guaiacylglyceryl) ether 7-O-hexoside           | Flavone | + | + | - | + | + | + | - | - | + | - | - | + | - | - |
| pmb1466 | Tricin 4'-O-syringic acid                                             | Flavone | + | + | - | + | + | + | - | - | + | - | - | + | - | + |
| pmb2850 | Tricin                                                                | Flavone | - | + | - | + | - | + | - | - | + | - | - | + | - | - |
| pmb2999 | Chrysoeriol 5-O-hexoside                                              | Flavone | + | + | + | + | + | + | - | + | + | - | - | + | - | + |
| pmb3024 | Luteolin C-hexoside                                                   | Flavone | - | + | - | - | - | + | + | - | - | + | - | - | - | - |



|         |                                                      |          |   |   |   |   |   |   |   |   |   |   |   |   |   |   |
|---------|------------------------------------------------------|----------|---|---|---|---|---|---|---|---|---|---|---|---|---|---|
| pmb3028 | Tricin O-sinapic acid                                | Flavone  | + | + | + | + | + | + | - | + | + | - | + | + | - | - |
| pmb3032 | Tricin O-malonyl rhamnoside                          | Flavone  | - | + | - | + | - | + | - | - | + | - | - | + | - | - |
| pmb3039 | Tricin O-oxalic acid O-coumaroyl<br>shikimic acid    | Flavone  | + | - | - | - | + | - | - | + | - | - | - | - | - | - |
| pmb3041 | Tricin O-saccharic acid                              | Flavone  | + | + | + | + | + | + | - | + | + | - | + | + | - | - |
| pmb3042 | Tricin 5-O-hexoside                                  | Flavone  | + | + | + | + | + | + | - | + | + | - | - | + | - | + |
| pmb3043 | Tricin 5-O-rutinoside                                | Flavone  | + | - | + | - | + | - | - | + | - | - | + | - | - | - |
| pmb3047 | Tricin 4'-O-(syringyl alcohol)<br>ether 5-O-hexoside | Flavone  | + | + | - | + | + | + | - | - | + | - | - | - | - | - |
| pmb3052 | Tricin 4'-O- $\beta$ -guaiacylglycerol               | Flavone  | + | - | + | - | + | - | - | + | - | - | + | - | - | + |
| pmb3894 | Di-O-methylquercetin                                 | Flavonol | + | - | + | - | + | - | - | + | - | - | + | - | - | + |
| pme0197 | Quercetin 3-O-rutinoside (Rutin)                     | Flavonol | + | - | + | - | + | - | - | + | - | - | + | - | - | + |

|         |                                                 |            |   |   |   |   |   |   |   |   |   |   |   |   |   |   |
|---------|-------------------------------------------------|------------|---|---|---|---|---|---|---|---|---|---|---|---|---|---|
| pme0355 | Daidzein                                        | Isoflavone | + | + | - | - | + | + | - | - | + | - | - | + | - | + |
| pme0364 | Chrysoeriol                                     | Flavone    | + | + | + | + | + | + | - | + | + | - | + | + | - | + |
| pme0377 | Naringenin                                      | Flavanone  | + | + | + | + | + | + | - | + | + | - | + | + | - | + |
| pme0379 | Apigenin                                        | Flavone    | + | + | + | + | + | + | - | + | + | - | - | + | - | + |
| pme0426 | 4-Methylcatechol                                | Polyphenol | - | + | - | - | - | + | - | - | + | - | - | - | - | - |
| pme1502 | Kumatakenin                                     | Flavonol   | + | + | + | + | + | + | - | + | + | - | - | + | - | + |
| pme1518 | Nobiletin                                       | Flavone    | + | + | + | + | + | + | + | + | + | + | + | + | + | + |
| pme1550 | Tangeretin                                      | Flavone    | + | + | + | + | + | + | + | + | + | + | + | + | + | + |
| pme1568 | "Orobol (5,7,3',4'-<br>tetrahydroxyisoflavone)" | Isoflavone | + | + | - | - | + | + | - | - | - | - | - | - | - | - |
| pme1578 | "Genistein (4',5,7-<br>Trihydroxyisoflavone)"   | Isoflavone | - | + | - | - | - | + | - | - | + | - | - | + | - | - |

|         |                                  |            |   |   |   |   |   |   |   |   |   |   |   |   |   |   |
|---------|----------------------------------|------------|---|---|---|---|---|---|---|---|---|---|---|---|---|---|
| pme1580 | Eriodictyol                      | Flavanone  | - | + | - | + | - | + | - | - | + | - | - | + | - | - |
| pme1583 | Eriodictyol                      | Flavanone  | + | - | + | - | + | - | - | - | - | - | - | - | - | + |
| pme1588 | Isorhamnetin(3'-Methylquercetin) | Flavonol   | + | + | + | + | + | + | - | - | - | - | - | - | - | + |
| pme1598 | Hesperetin 5-O-glucoside         | Flavanone  | + | + | + | + | + | + | - | - | + | - | - | + | - | + |
| pme1600 | 7-O-Methyleriodictyol            | Flavanone  | - | + | - | + | - | + | - | - | - | - | - | - | - | - |
| pme1824 | Protocatechuic acid              | Polyphenol | + | + | + | + | + | + | + | + | + | + | + | + | + | - |
| pme2478 | Protocatechuic aldehyde          | Polyphenol | + | - | + | - | + | - | - | + | - | - | + | - | - | - |
| pme2482 | Protocatechuic aldehyde          | Polyphenol | - | + | - | + | - | + | - | - | + | - | - | + | - | - |
| pme2954 | Quercetin                        | Flavonol   | - | + | - | - | - | + | - | - | + | - | - | - | - | - |
| pme2957 | Naringenin chalcone              | Chalcone   | - | + | - | + | - | + | - | - | + | - | - | + | - | - |
| pme2960 | Naringenin chalcone              | Chalcone   | - | - | - | - | - | - | - | - | - | - | - | - | - | - |
| pme3134 | 3'-Hydroxyflavone                | Flavone    | - | - | - | - | + | - | - | - | - | - | + | - | - | - |

|         |                                                |            |   |   |   |   |   |   |   |   |   |   |   |   |   |   |
|---------|------------------------------------------------|------------|---|---|---|---|---|---|---|---|---|---|---|---|---|---|
| pme3137 | 3'-Hydroxyflavone                              | Flavone    | - | - | - | + | - | + | - | - | + | - | - | - | - | - |
| pme3230 | Calycosin                                      | Isoflavone | - | - | - | - | - | + | - | - | + | - | - | + | - | - |
| pme3282 | "Afzelechin (3,5,7,4'-<br>Tetrahydroxyflavan)" | Flavanonol | - | + | + | + | + | + | + | + | + | + | + | + | + | - |
| pme3292 | Prunetin                                       | Isoflavone | - | + | - | + | - | + | - | - | + | - | - | + | - | - |
| pme3464 | Isosakuranetin (4'-<br>Methylnaringenin)       | Flavanone  | + | + | + | + | + | + | - | + | - | - | - | - | - | - |
| pme3473 | Butin                                          | Flavanone  | + | + | + | + | + | + | - | + | + | - | + | + | - | + |
| pmf0011 | "Apigenin 6,8-C-diglucoside"                   | Flavone    | + | + | + | + | + | + | - | + | + | - | + | + | - | + |
| pmf0012 | "Apigenin 6,8-C-diglucoside"                   | Flavone    | + | + | + | + | + | + | - | - | + | - | - | + | - | - |
| pmf0057 | Naringenin chalcone                            | Chalcone   | + | + | + | + | + | + | - | + | + | - | + | + | - | - |
| pmf0058 | Naringenin                                     | Flavanone  | + | + | + | + | + | + | - | + | + | - | + | + | - | + |

|         |                                                    |            |   |   |   |   |   |   |   |   |   |   |   |   |   |   |   |
|---------|----------------------------------------------------|------------|---|---|---|---|---|---|---|---|---|---|---|---|---|---|---|
| pmf0179 | Narcissoside(3'-Methylquercetin<br>3-O-rutinoside) | Flavonol   | + | + | + | + | + | + | + | - | + | + | - | + | + | - | + |
| pmf0204 | Hyperoside(Quercetin 3-D-<br>galactoside)          | Flavonol   | + | - | + | + | + | + | + | - | + | + | - | + | + | - | + |
| pmf0208 | Isoquercitroside                                   | Flavonol   | + | - | + | + | + | + | + | - | + | + | - | - | + | - | + |
| pmf0374 | Isorhamnetin 3-O-glucoside                         | Flavonol   | + | - | + | - | + | - | - | - | - | - | - | + | - | - | + |
| pmf0375 | Isorhamnetin 3-O-glucoside                         | Flavonol   | - | + | - | + | - | + | - | - | + | - | - | + | - | - | - |
| pmf0417 | Eriocitrin                                         | Flavanone  | + | + | + | - | + | + | - | - | + | - | - | - | - | - | + |
| pmf0548 | Schaftoside                                        | Flavone    | + | + | + | + | + | + | + | + | + | + | + | + | + | + | + |
| pmf0549 | Diosmin                                            | Flavone    | - | + | - | + | - | + | - | - | + | - | - | + | - | - | - |
| pmf0550 | Diosmin                                            | Flavone    | + | - | + | - | + | - | - | + | - | - | - | - | - | - | + |
| pmf0567 | Tectorigenin                                       | Isoflavone | + | + | - | + | + | + | - | + | + | - | - | + | - | - | + |

Notes: “+” and “-” indicate the positive and negative detection, respectively.

**Table S4 Monomers with different proportion in diet and feces.**

| Group | N  | Trend                   | Index   | Class      | Mean percentage in diet | Mean percentage in feces | Method of statistics | Statistics F or W | P        | FDR      |
|-------|----|-------------------------|---------|------------|-------------------------|--------------------------|----------------------|-------------------|----------|----------|
| WL    | 74 | Diet > Feces<br>(n=18); | pme0355 | Isoflavone | 4.0E-05                 | 7.9E-06                  | anova                | 1.50E+01          | 1.94E-03 | 1.03E-02 |
|       |    |                         | pmb3047 | Flavone    | 8.0E-04                 | 5.0E-04                  | anova                | 1.23E+01          | 3.87E-03 | 1.79E-02 |
|       |    |                         | pme1598 | Flavanone  | 9.3E-04                 | 2.9E-04                  | anova                | 1.79E+01          | 9.76E-04 | 6.02E-03 |
|       |    |                         | pmf0179 | Flavonol   | 1.4E-03                 | 6.9E-04                  | anova                | 1.17E+01          | 4.58E-03 | 1.99E-02 |
|       |    | Diet < Feces<br>(n=0)   | pmb0744 | Flavone    | 2.0E-03                 | 9.4E-04                  | anova                | 1.07E+02          | 1.20E-07 | 1.77E-06 |
|       |    |                         | pma6389 | Flavonol   | 2.2E-03                 | 1.0E-03                  | anova                | 2.70E+01          | 1.72E-04 | 1.16E-03 |
|       |    |                         | pmb2999 | Flavone    | 3.3E-03                 | 9.3E-04                  | anova                | 3.81E+01          | 3.35E-05 | 2.48E-04 |
|       |    |                         | pmb0661 | Flavone    | 4.2E-03                 | 1.1E-03                  | anova                | 1.67E+02          | 8.51E-09 | 2.10E-07 |

|    |    |              |         |           |         |         |       |          |          |          |
|----|----|--------------|---------|-----------|---------|---------|-------|----------|----------|----------|
|    |    |              | pmb0628 | Flavanone | 6.3E-03 | 3.0E-03 | anova | 1.11E+01 | 5.38E-03 | 2.13E-02 |
|    |    |              | pmb0736 | Flavone   | 8.1E-03 | 1.7E-03 | anova | 8.08E+01 | 6.09E-07 | 7.52E-06 |
|    |    |              | pmf0011 | Flavone   | 2.2E-02 | 1.4E-02 | anova | 1.57E+01 | 1.64E-03 | 9.31E-03 |
|    |    |              | pmb0576 | Flavone   | 1.3E-02 | 3.4E-03 | anova | 5.17E+01 | 7.03E-06 | 6.50E-05 |
|    |    |              | pma0249 | Flavone   | 2.3E-02 | 5.6E-03 | anova | 1.54E+02 | 1.40E-08 | 2.60E-07 |
|    |    |              | pma0795 | Flavone   | 2.2E-02 | 2.8E-03 | anova | 1.80E+02 | 5.34E-09 | 1.98E-07 |
|    |    |              | pmb3042 | Flavone   | 3.6E-02 | 1.2E-02 | anova | 5.21E+01 | 6.78E-06 | 6.50E-05 |
|    |    |              | pmb0689 | Flavone   | 3.0E-02 | 1.1E-03 | anova | 6.32E+02 | 2.09E-12 | 1.55E-10 |
|    |    |              | pma1116 | Flavonol  | 7.9E-02 | 3.6E-02 | anova | 1.42E+01 | 2.33E-03 | 1.15E-02 |
|    |    |              | pma0791 | Flavanone | 5.8E-02 | 1.1E-02 | anova | 4.73E+01 | 1.13E-05 | 9.28E-05 |
| WS | 34 | Diet > Feces | pme1518 | Flavone   | 1.5E-03 | 6.2E-04 | anova | 1.04E+01 | 8.16E-03 | 3.03E-02 |
|    |    | (n=4)        | pma0791 | Flavanone | 8.3E-03 | 1.9E-03 | anova | 1.40E+01 | 3.29E-03 | 3.03E-02 |



|    |    |                       |         |            |         |         |        |          |          |          |
|----|----|-----------------------|---------|------------|---------|---------|--------|----------|----------|----------|
|    |    | Diet < Feces          | pmb0576 | Flavone    | 1.4E-02 | 3.7E-03 | anova  | 2.04E+01 | 8.75E-04 | 1.49E-02 |
|    |    | (n=0)                 | pmf0208 | Flavonol   | 7.7E-02 | 1.2E-02 | anova  | 2.19E+02 | 1.32E-08 | 4.49E-07 |
| CL | 78 | Diet < Feces<br>(n=9) | pmb0607 | Flavone    | 2.2E-03 | 5.8E-02 | wilcox | 0.00E+00 | 5.56E-03 | 1.55E-02 |
|    |    |                       | pmb1312 | Flavone    | 1.5E-03 | 4.3E-02 | wilcox | 0.00E+00 | 5.56E-03 | 1.55E-02 |
|    |    |                       | pme0377 | Flavanone  | 6.7E-04 | 3.7E-02 | wilcox | 0.00E+00 | 5.56E-03 | 1.55E-02 |
|    |    |                       | pmb0693 | Flavone    | 9.9E-04 | 3.6E-02 | wilcox | 0.00E+00 | 5.56E-03 | 1.55E-02 |
|    |    |                       | pmb0701 | Flavone    | 4.2E-04 | 2.3E-02 | wilcox | 0.00E+00 | 5.56E-03 | 1.55E-02 |
|    |    |                       | pme0379 | Flavone    | 3.6E-04 | 1.8E-02 | wilcox | 0.00E+00 | 5.56E-03 | 1.55E-02 |
|    |    |                       | pme3473 | Flavanone  | 2.7E-04 | 1.6E-02 | wilcox | 0.00E+00 | 5.56E-03 | 1.55E-02 |
|    |    |                       | pme3282 | Flavanonol | 5.6E-05 | 2.2E-03 | wilcox | 0.00E+00 | 5.56E-03 | 1.55E-02 |
|    |    |                       | pmf0567 | Isoflavone | 5.5E-05 | 3.7E-04 | wilcox | 0.00E+00 | 5.56E-03 | 1.55E-02 |
|    |    | Diet > Feces          | pmb0743 | Flavone    | 2.8E-04 | 7.7E-05 | anova  | 5.25E+01 | 5.60E-08 | 4.03E-07 |

|  |  |        |         |           |         |         |        |          |          |          |
|--|--|--------|---------|-----------|---------|---------|--------|----------|----------|----------|
|  |  | (n=20) | pmb3028 | Flavone   | 4.7E-04 | 6.5E-05 | anova  | 5.48E+01 | 3.69E-08 | 3.19E-07 |
|  |  |        | pme1588 | Flavonol  | 1.1E-03 | 6.8E-05 | anova  | 1.01E+03 | 4.57E-24 | 1.78E-22 |
|  |  |        | pmb3041 | Flavone   | 1.9E-03 | 2.1E-04 | anova  | 1.71E+02 | 1.06E-13 | 2.07E-12 |
|  |  |        | pmb0636 | Flavone   | 2.7E-03 | 9.2E-04 | anova  | 3.26E+01 | 3.55E-06 | 2.13E-05 |
|  |  |        | pma6389 | Flavonol  | 2.6E-03 | 5.5E-04 | anova  | 5.24E+01 | 5.68E-08 | 4.03E-07 |
|  |  |        | pmb0631 | Flavone   | 4.9E-03 | 2.8E-03 | wilcox | 8.20E+01 | 8.31E-03 | 2.13E-02 |
|  |  |        | pmb2999 | Flavone   | 3.9E-03 | 5.8E-04 | anova  | 1.24E+02 | 5.29E-12 | 5.89E-11 |
|  |  |        | pmb0628 | Flavanone | 6.2E-03 | 6.7E-04 | anova  | 2.68E+02 | 3.39E-16 | 8.82E-15 |
|  |  |        | pma0249 | Flavone   | 8.0E-03 | 1.6E-03 | anova  | 2.85E+01 | 1.00E-05 | 5.20E-05 |
|  |  |        | pma0795 | Flavone   | 1.3E-02 | 1.2E-03 | anova  | 1.51E+02 | 4.90E-13 | 7.64E-12 |
|  |  |        | pmb0647 | Flavone   | 1.6E-02 | 3.1E-03 | anova  | 6.11E+01 | 1.27E-08 | 1.24E-07 |
|  |  |        | mws4092 | Flavone   | 1.8E-02 | 5.8E-04 | anova  | 2.97E+03 | 9.16E-31 | 7.14E-29 |

|      |    |                        |         |           |         |         |        |          |          |          |
|------|----|------------------------|---------|-----------|---------|---------|--------|----------|----------|----------|
|      |    |                        | pmb0608 | Flavone   | 4.5E-02 | 5.8E-03 | wilcox | 8.40E+01 | 5.56E-03 | 1.55E-02 |
|      |    |                        | pmb0622 | Flavone   | 6.2E-02 | 1.7E-02 | anova  | 3.12E+01 | 5.00E-06 | 2.79E-05 |
|      |    |                        | pma6371 | Flavone   | 6.8E-02 | 1.7E-02 | wilcox | 8.40E+01 | 5.56E-03 | 1.55E-02 |
|      |    |                        | pmb3042 | Flavone   | 6.2E-02 | 9.0E-03 | anova  | 1.37E+02 | 1.72E-12 | 2.24E-11 |
|      |    |                        | pma1116 | Flavonol  | 9.8E-02 | 2.2E-02 | anova  | 4.77E+01 | 1.36E-07 | 8.84E-07 |
|      |    |                        | pmf0011 | Flavone   | 9.9E-02 | 2.1E-02 | wilcox | 8.40E+01 | 5.56E-03 | 1.55E-02 |
|      |    |                        | pmb0624 | Flavone   | 1.2E-01 | 1.8E-02 | wilcox | 8.40E+01 | 5.56E-03 | 1.55E-02 |
| CS_I | 43 | Diet > Feces<br>(n=15) | pmb0681 | Flavone   | 6.4E-04 | 8.8E-05 | anova  | 2.00E+01 | 7.60E-04 | 3.63E-03 |
|      |    |                        | pma0791 | Flavanone | 6.6E-04 | 9.1E-05 | anova  | 1.18E+01 | 4.92E-03 | 1.47E-02 |
|      |    | Diet < Feces<br>(n=0)  | pmb0689 | Flavone   | 1.0E-03 | 2.9E-04 | anova  | 1.34E+01 | 3.30E-03 | 1.09E-02 |
|      |    |                        | pmb2999 | Flavone   | 2.0E-03 | 4.7E-04 | anova  | 1.17E+01 | 5.14E-03 | 1.47E-02 |
|      |    |                        | pmb3041 | Flavone   | 2.9E-03 | 3.2E-04 | anova  | 1.10E+02 | 2.18E-07 | 2.35E-06 |

|       |    |                       |         |            |         |         |       |          |          |          |
|-------|----|-----------------------|---------|------------|---------|---------|-------|----------|----------|----------|
|       |    |                       | pmb0647 | Flavone    | 4.0E-03 | 2.1E-04 | anova | 1.23E+02 | 1.18E-07 | 1.69E-06 |
|       |    |                       | pmb0608 | Flavone    | 4.9E-03 | 1.8E-04 | anova | 2.39E+02 | 2.78E-09 | 5.98E-08 |
|       |    |                       | pma6389 | Flavonol   | 5.7E-03 | 3.0E-04 | anova | 3.02E+02 | 7.11E-10 | 3.06E-08 |
|       |    |                       | pma0214 | Flavonol   | 8.0E-03 | 1.7E-03 | anova | 4.79E+01 | 1.61E-05 | 1.15E-04 |
|       |    |                       | pmb3028 | Flavone    | 9.4E-03 | 1.6E-03 | anova | 3.84E+01 | 4.61E-05 | 2.48E-04 |
|       |    |                       | pmf0179 | Flavonol   | 1.1E-02 | 3.3E-03 | anova | 1.90E+01 | 9.30E-04 | 4.00E-03 |
|       |    |                       | pmb0595 | Flavonol   | 1.3E-02 | 2.6E-03 | anova | 4.39E+01 | 2.43E-05 | 1.50E-04 |
|       |    |                       | pma1116 | Flavonol   | 1.8E-02 | 4.0E-03 | anova | 1.47E+01 | 2.39E-03 | 9.34E-03 |
|       |    |                       | pmb3042 | Flavone    | 2.5E-02 | 2.6E-03 | anova | 6.35E+01 | 3.91E-06 | 3.36E-05 |
|       |    |                       | pme1824 | Polyphenol | 4.6E-01 | 1.0E-01 | anova | 1.38E+01 | 2.96E-03 | 1.06E-02 |
| CS_II | 23 | Diet > Feces<br>(n=7) | pme1550 | Flavone    | 5.5E-03 | 2.8E-03 | anova | 1.35E+01 | 3.68E-03 | 1.41E-02 |
|       |    |                       | pmb3041 | Flavone    | 3.4E-03 | 3.5E-04 | anova | 2.53E+02 | 6.15E-09 | 1.05E-07 |

|  |  |                           |         |            |         |         |       |          |          |          |
|--|--|---------------------------|---------|------------|---------|---------|-------|----------|----------|----------|
|  |  | Diet < Feces<br><br>(n=0) | pma6389 | Flavonol   | 3.8E-03 | 5.0E-04 | anova | 2.35E+02 | 9.15E-09 | 1.05E-07 |
|  |  |                           | pme1518 | Flavone    | 6.2E-03 | 2.6E-03 | anova | 2.43E+01 | 4.51E-04 | 2.08E-03 |
|  |  |                           | pmf0204 | Flavonol   | 2.5E-02 | 5.5E-03 | anova | 7.09E+01 | 4.00E-06 | 3.07E-05 |
|  |  |                           | pma0214 | Flavonol   | 1.8E-01 | 7.5E-02 | anova | 1.09E+01 | 6.97E-03 | 2.29E-02 |
|  |  |                           | pme1824 | Polyphenol | 1.4E-01 | 2.7E-02 | anova | 4.04E+01 | 5.39E-05 | 3.10E-04 |

N: The number of shared flavonoids in both diet and corresponding feces; Trend: The changing trend from diet to the feces (the number of flavonoids); anova: one-way analysis of variance; wilcox: Wilcoxon rank sum test.

**Table S5 Sample information for metagenomic analysis and assembly information.**

| Sample_ID | Original name | Group | Data source    | Clean base<br>(bp) | Contigs  | Contigs<br>bases (bp) | N50 (bp) | N90 (bp) | Max (bp) | Min (bp) |
|-----------|---------------|-------|----------------|--------------------|----------|-----------------------|----------|----------|----------|----------|
| 1         | A074          | WL    | published data | 1.92E+09           | 3.14E+03 | 9.09E+06              | 3.50E+04 | 6.24E+02 | 3.88E+05 | 3.00E+02 |
| 2         | AM120105      | WL    | published data | 4.87E+09           | 3.41E+04 | 2.69E+07              | 8.59E+02 | 3.78E+02 | 9.06E+04 | 3.00E+02 |
| 3         | AM120401      | WL    | published data | 4.69E+09           | 2.51E+04 | 2.62E+07              | 1.56E+03 | 4.14E+02 | 1.25E+05 | 3.00E+02 |
| 4         | AM120405      | WL    | published data | 5.94E+09           | 6.53E+04 | 5.95E+07              | 1.13E+03 | 3.89E+02 | 3.80E+05 | 3.00E+02 |
| 5         | AM120406      | WL    | published data | 6.53E+09           | 3.38E+04 | 3.71E+07              | 1.63E+03 | 4.28E+02 | 1.11E+05 | 3.00E+02 |
| 6         | AM120506      | WS    | published data | 8.06E+09           | 5.23E+04 | 6.78E+07              | 2.91E+03 | 4.47E+02 | 2.20E+05 | 3.00E+02 |
| 7         | AM120701      | WS    | published data | 6.93E+09           | 5.41E+04 | 9.19E+07              | 4.10E+03 | 5.51E+02 | 2.59E+05 | 3.00E+02 |
| 8         | AM120806      | WS    | published data | 8.11E+09           | 3.22E+04 | 3.50E+07              | 1.76E+03 | 4.12E+02 | 4.95E+05 | 3.00E+02 |
| 9         | AM1208X1      | WS    | published data | 7.44E+09           | 2.21E+04 | 2.18E+07              | 1.38E+03 | 4.02E+02 | 1.15E+05 | 3.00E+02 |

|    |          |    |                |          |          |          |          |          |          |          |
|----|----------|----|----------------|----------|----------|----------|----------|----------|----------|----------|
| 10 | AM130101 | WL | published data | 2.71E+09 | 1.91E+04 | 2.20E+07 | 2.09E+03 | 4.19E+02 | 1.63E+05 | 3.00E+02 |
| 11 | AM130104 | WL | published data | 4.79E+09 | 2.50E+04 | 3.17E+07 | 2.79E+03 | 4.36E+02 | 2.62E+05 | 3.00E+02 |
| 12 | AM130105 | WL | published data | 6.53E+09 | 4.99E+04 | 3.56E+07 | 7.56E+02 | 3.75E+02 | 9.35E+04 | 3.00E+02 |
| 13 | AM130301 | WL | published data | 6.05E+09 | 1.73E+04 | 2.35E+07 | 3.17E+03 | 4.54E+02 | 7.57E+04 | 3.00E+02 |
| 14 | AM130303 | WL | published data | 4.33E+09 | 2.11E+04 | 1.85E+07 | 1.05E+03 | 3.92E+02 | 2.40E+05 | 3.00E+02 |
| 15 | AM130305 | WL | published data | 2.89E+09 | 2.09E+04 | 2.32E+07 | 2.00E+03 | 4.09E+02 | 6.03E+04 | 3.00E+02 |
| 16 | AM130503 | WS | published data | 7.90E+09 | 5.97E+04 | 7.71E+07 | 2.41E+03 | 4.63E+02 | 2.50E+05 | 3.00E+02 |
| 17 | AM130505 | WS | published data | 6.02E+09 | 3.18E+04 | 3.26E+07 | 1.70E+03 | 3.85E+02 | 1.90E+05 | 3.00E+02 |
| 18 | AM130506 | WS | published data | 6.22E+09 | 1.15E+04 | 1.41E+07 | 1.96E+03 | 4.68E+02 | 5.68E+05 | 3.00E+02 |
| 19 | AM130701 | WS | published data | 5.63E+09 | 4.76E+04 | 7.08E+07 | 4.19E+03 | 4.60E+02 | 2.02E+05 | 3.00E+02 |
| 20 | AM130703 | WS | published data | 6.21E+09 | 1.61E+04 | 2.62E+07 | 6.01E+03 | 5.03E+02 | 4.81E+05 | 3.00E+02 |
| 21 | AM130706 | WS | published data | 6.86E+09 | 3.42E+04 | 5.70E+07 | 4.67E+03 | 5.20E+02 | 2.48E+05 | 3.00E+02 |

|    |          |    |                |          |          |          |          |          |          |          |
|----|----------|----|----------------|----------|----------|----------|----------|----------|----------|----------|
| 22 | AM1307X1 | WS | published data | 6.08E+09 | 3.09E+04 | 4.05E+07 | 2.44E+03 | 4.66E+02 | 4.20E+05 | 3.00E+02 |
| 23 | AM130801 | WS | published data | 6.41E+09 | 3.55E+04 | 3.66E+07 | 1.43E+03 | 4.22E+02 | 2.70E+05 | 3.00E+02 |
| 24 | AM130803 | WS | published data | 7.10E+09 | 3.29E+04 | 4.91E+07 | 3.53E+03 | 4.93E+02 | 4.70E+05 | 3.00E+02 |
| 25 | AM130806 | WS | published data | 8.18E+09 | 1.53E+04 | 3.57E+07 | 1.36E+04 | 6.17E+02 | 4.64E+05 | 3.00E+02 |
| 26 | AM1308X1 | WS | published data | 6.80E+09 | 4.77E+04 | 4.72E+07 | 1.42E+03 | 4.03E+02 | 1.43E+05 | 3.00E+02 |
| 27 | WL1      | WL | This study     | 1.82E+10 | 7.05E+04 | 7.09E+07 | 1.61E+03 | 3.82E+02 | 2.14E+05 | 3.00E+02 |
| 28 | WL3      | WL | This study     | 1.50E+10 | 6.86E+04 | 7.04E+07 | 1.62E+03 | 3.86E+02 | 1.90E+05 | 3.00E+02 |
| 29 | WL4      | WL | This study     | 1.51E+10 | 6.62E+04 | 6.57E+07 | 1.53E+03 | 3.83E+02 | 1.15E+05 | 3.00E+02 |
| 30 | WL5      | WL | This study     | 1.48E+10 | 7.30E+04 | 7.20E+07 | 1.49E+03 | 3.81E+02 | 3.39E+05 | 3.00E+02 |
| 31 | WL9      | WL | This study     | 1.53E+10 | 6.87E+04 | 7.53E+07 | 1.97E+03 | 3.92E+02 | 3.37E+05 | 3.00E+02 |
| 32 | WL10     | WL | This study     | 1.85E+10 | 4.41E+04 | 5.65E+07 | 2.67E+03 | 4.33E+02 | 1.50E+05 | 3.00E+02 |
| 33 | WL11     | WL | This study     | 1.81E+10 | 7.43E+04 | 8.19E+07 | 2.02E+03 | 3.95E+02 | 1.76E+05 | 3.00E+02 |



|    |      |    |            |          |          |          |          |          |          |          |
|----|------|----|------------|----------|----------|----------|----------|----------|----------|----------|
| 34 | WL12 | WL | This study | 1.64E+10 | 5.25E+04 | 5.86E+07 | 2.04E+03 | 3.94E+02 | 1.76E+05 | 3.00E+02 |
| 35 | WL15 | WL | This study | 1.48E+10 | 6.79E+04 | 6.58E+07 | 1.47E+03 | 3.75E+02 | 4.64E+05 | 3.00E+02 |
| 36 | WL16 | WL | This study | 1.31E+10 | 4.97E+04 | 5.30E+07 | 1.74E+03 | 3.96E+02 | 1.54E+05 | 3.00E+02 |
| 37 | WL17 | WL | This study | 1.65E+10 | 7.81E+04 | 9.61E+07 | 2.66E+03 | 4.11E+02 | 3.15E+05 | 3.00E+02 |
| 38 | WL18 | WL | This study | 1.65E+10 | 4.52E+04 | 5.10E+07 | 1.94E+03 | 4.05E+02 | 4.23E+05 | 3.00E+02 |
| 39 | WL20 | WL | This study | 1.34E+10 | 5.83E+04 | 5.97E+07 | 1.57E+03 | 3.90E+02 | 2.24E+05 | 3.00E+02 |
| 40 | WL22 | WL | This study | 1.49E+10 | 8.53E+04 | 9.42E+07 | 1.87E+03 | 3.95E+02 | 2.58E+05 | 3.00E+02 |
| 41 | WL24 | WL | This study | 1.67E+10 | 1.02E+05 | 8.98E+07 | 1.16E+03 | 3.72E+02 | 2.79E+05 | 3.00E+02 |
| 42 | WL25 | WL | This study | 1.67E+10 | 1.38E+05 | 1.15E+08 | 1.06E+03 | 3.61E+02 | 2.14E+05 | 3.00E+02 |
| 43 | WL27 | WL | This study | 1.27E+10 | 3.10E+04 | 4.12E+07 | 3.20E+03 | 4.29E+02 | 2.38E+05 | 3.00E+02 |
| 44 | WS1  | WS | This study | 1.64E+10 | 1.40E+05 | 1.46E+08 | 1.70E+03 | 3.91E+02 | 2.72E+05 | 3.00E+02 |
| 45 | WS2  | WS | This study | 1.59E+10 | 8.00E+04 | 8.26E+07 | 2.11E+03 | 3.70E+02 | 1.73E+05 | 3.00E+02 |

|    |      |    |            |          |          |          |          |          |          |          |
|----|------|----|------------|----------|----------|----------|----------|----------|----------|----------|
| 46 | WS3  | WS | This study | 1.37E+10 | 9.14E+04 | 9.12E+07 | 1.98E+03 | 3.58E+02 | 3.27E+05 | 3.00E+02 |
| 47 | WS4  | WS | This study | 1.67E+10 | 8.35E+04 | 7.87E+07 | 1.48E+03 | 3.66E+02 | 4.20E+05 | 3.00E+02 |
| 48 | WS5  | WS | This study | 1.67E+10 | 3.85E+05 | 2.16E+08 | 5.06E+02 | 3.25E+02 | 1.33E+05 | 3.00E+02 |
| 49 | WS6  | WS | This study | 1.59E+10 | 6.16E+04 | 5.70E+07 | 1.33E+03 | 3.74E+02 | 7.41E+04 | 3.00E+02 |
| 50 | WS8  | WS | This study | 2.02E+10 | 1.71E+05 | 1.26E+08 | 7.78E+02 | 3.39E+02 | 1.35E+05 | 3.00E+02 |
| 51 | WS7  | WS | This study | 1.39E+10 | 5.08E+04 | 6.18E+07 | 2.42E+03 | 4.17E+02 | 5.61E+05 | 3.00E+02 |
| 52 | WS9  | WS | This study | 1.46E+10 | 6.35E+04 | 5.31E+07 | 1.00E+03 | 3.45E+02 | 5.78E+05 | 3.00E+02 |
| 53 | CS13 | CS | This study | 1.51E+10 | 3.20E+05 | 2.86E+08 | 1.18E+03 | 3.79E+02 | 1.17E+05 | 3.00E+02 |
| 54 | CS14 | CS | This study | 1.42E+10 | 1.52E+05 | 1.27E+08 | 1.03E+03 | 3.62E+02 | 1.24E+05 | 3.00E+02 |
| 55 | CS15 | CS | This study | 1.40E+10 | 1.12E+05 | 1.04E+08 | 1.27E+03 | 3.75E+02 | 5.00E+05 | 3.00E+02 |
| 56 | CS16 | CS | This study | 1.67E+10 | 1.23E+05 | 1.10E+08 | 1.22E+03 | 3.69E+02 | 2.62E+05 | 3.00E+02 |
| 57 | CS17 | CS | This study | 1.73E+10 | 3.49E+05 | 2.95E+08 | 1.05E+03 | 3.73E+02 | 2.76E+05 | 3.00E+02 |

|    |      |    |            |          |          |          |          |          |          |          |
|----|------|----|------------|----------|----------|----------|----------|----------|----------|----------|
| 58 | CS18 | CS | This study | 1.65E+10 | 2.40E+05 | 2.04E+08 | 1.06E+03 | 3.73E+02 | 2.56E+05 | 3.00E+02 |
| 59 | CS19 | CS | This study | 1.40E+10 | 3.03E+05 | 2.53E+08 | 1.01E+03 | 3.72E+02 | 3.07E+05 | 3.00E+02 |
| 60 | CS20 | CS | This study | 1.58E+10 | 2.49E+05 | 2.27E+08 | 1.21E+03 | 3.77E+02 | 2.36E+05 | 3.00E+02 |
| 61 | CS21 | CS | This study | 1.51E+10 | 3.36E+05 | 2.83E+08 | 1.03E+03 | 3.72E+02 | 2.07E+05 | 3.00E+02 |
| 62 | CS22 | CS | This study | 1.48E+10 | 2.42E+05 | 2.11E+08 | 1.13E+03 | 3.74E+02 | 1.19E+05 | 3.00E+02 |
| 63 | CS23 | CS | This study | 1.44E+10 | 3.98E+05 | 3.13E+08 | 9.39E+02 | 3.63E+02 | 1.99E+05 | 3.00E+02 |
| 64 | CS25 | CS | This study | 1.50E+10 | 1.14E+05 | 1.10E+08 | 1.53E+03 | 3.71E+02 | 2.23E+05 | 3.00E+02 |
| 65 | CS26 | CS | This study | 1.62E+10 | 3.37E+05 | 3.11E+08 | 1.27E+03 | 3.80E+02 | 2.41E+05 | 3.00E+02 |
| 66 | CS28 | CS | This study | 1.43E+10 | 1.93E+05 | 1.60E+08 | 1.03E+03 | 3.67E+02 | 1.23E+05 | 3.00E+02 |
| 67 | CS29 | CS | This study | 1.46E+10 | 2.34E+05 | 2.00E+08 | 1.10E+03 | 3.65E+02 | 2.26E+05 | 3.00E+02 |
| 68 | CS30 | CS | This study | 1.57E+10 | 6.37E+04 | 7.86E+07 | 2.74E+03 | 4.17E+02 | 1.46E+05 | 3.00E+02 |
| 69 | CS31 | CS | This study | 1.52E+10 | 2.95E+05 | 2.73E+08 | 1.27E+03 | 3.82E+02 | 1.74E+05 | 3.00E+02 |

|    |      |    |            |          |          |          |          |          |          |          |
|----|------|----|------------|----------|----------|----------|----------|----------|----------|----------|
| 70 | CS32 | CS | This study | 1.62E+10 | 3.25E+05 | 3.02E+08 | 1.27E+03 | 3.79E+02 | 3.13E+05 | 3.00E+02 |
| 71 | CS33 | CS | This study | 1.53E+10 | 2.08E+05 | 1.98E+08 | 1.37E+03 | 3.84E+02 | 1.69E+05 | 3.00E+02 |
| 72 | CS34 | CS | This study | 1.50E+10 | 2.46E+05 | 2.12E+08 | 1.10E+03 | 3.72E+02 | 2.58E+05 | 3.00E+02 |
| 73 | CS35 | CS | This study | 1.46E+10 | 2.01E+05 | 1.73E+08 | 1.09E+03 | 3.73E+02 | 2.57E+05 | 3.00E+02 |
| 74 | CT1  |    | This study | 1.39E+10 | 1.79E+04 | 1.73E+07 | 1.54E+03 | 3.67E+02 | 1.25E+05 | 3.00E+02 |
| 75 | CT2  |    | This study | 1.38E+10 | 4.90E+04 | 5.12E+07 | 1.68E+03 | 3.99E+02 | 7.72E+04 | 3.00E+02 |
| 76 | CT3  |    | This study | 1.58E+10 | 8.11E+04 | 5.76E+07 | 7.66E+02 | 3.34E+02 | 1.46E+05 | 3.00E+02 |
| 77 | CT4  |    | This study | 1.45E+10 | 9.11E+04 | 9.56E+07 | 1.68E+03 | 3.89E+02 | 2.35E+05 | 3.00E+02 |
| 78 | CT5  |    | This study | 1.49E+10 | 6.94E+04 | 6.61E+07 | 1.42E+03 | 3.71E+02 | 3.23E+05 | 3.00E+02 |
| 79 | CT6  |    | This study | 1.43E+10 | 8.87E+04 | 8.39E+07 | 1.31E+03 | 3.74E+02 | 2.58E+05 | 3.00E+02 |
| 80 | CT7  |    | This study | 1.49E+10 | 1.29E+05 | 1.14E+08 | 1.11E+03 | 3.73E+02 | 2.22E+05 | 3.00E+02 |
| 81 | CT8  |    | This study | 1.51E+10 | 1.40E+05 | 1.27E+08 | 1.17E+03 | 3.83E+02 | 2.52E+05 | 3.00E+02 |

|    |      |    |            |          |          |          |          |          |          |          |
|----|------|----|------------|----------|----------|----------|----------|----------|----------|----------|
| 82 | CT9  |    | This study | 1.63E+10 | 5.51E+04 | 7.28E+07 | 4.12E+03 | 4.08E+02 | 4.05E+05 | 3.00E+02 |
| 83 | CT10 |    | This study | 1.32E+10 | 5.03E+04 | 4.77E+07 | 1.32E+03 | 3.74E+02 | 4.16E+05 | 3.00E+02 |
| 84 | CL1  | CL | This study | 1.38E+10 | 1.12E+05 | 9.37E+07 | 1.05E+03 | 3.60E+02 | 1.25E+05 | 3.00E+02 |
| 85 | CL2  | CL | This study | 1.51E+10 | 1.03E+05 | 9.06E+07 | 1.18E+03 | 3.67E+02 | 2.52E+05 | 3.00E+02 |
| 86 | CL3  | CL | This study | 1.50E+10 | 1.08E+05 | 9.10E+07 | 1.11E+03 | 3.61E+02 | 1.38E+05 | 3.00E+02 |
| 87 | CL4  | CL | This study | 1.52E+10 | 8.48E+04 | 7.74E+07 | 1.36E+03 | 3.62E+02 | 1.40E+05 | 3.00E+02 |
| 88 | CL5  | CL | This study | 1.49E+10 | 7.30E+04 | 6.67E+07 | 1.30E+03 | 3.62E+02 | 1.68E+05 | 3.00E+02 |
| 89 | CL7  | CL | This study | 1.40E+10 | 1.63E+04 | 2.11E+07 | 2.80E+03 | 4.37E+02 | 1.22E+05 | 3.00E+02 |
| 90 | CL8  | CL | This study | 1.84E+10 | 8.22E+04 | 8.07E+07 | 1.53E+03 | 3.77E+02 | 4.13E+05 | 3.00E+02 |
| 91 | CL9  | CL | This study | 1.37E+10 | 9.47E+04 | 8.29E+07 | 1.16E+03 | 3.67E+02 | 1.03E+05 | 3.00E+02 |
| 92 | CL10 | CL | This study | 1.40E+10 | 6.81E+04 | 6.18E+07 | 1.30E+03 | 3.67E+02 | 1.09E+05 | 3.00E+02 |
| 93 | CL11 | CL | This study | 1.36E+10 | 7.78E+04 | 6.94E+07 | 1.19E+03 | 3.72E+02 | 8.89E+05 | 3.00E+02 |

|     |      |    |            |          |          |          |          |          |          |          |
|-----|------|----|------------|----------|----------|----------|----------|----------|----------|----------|
| 94  | CL12 | CL | This study | 1.51E+10 | 7.51E+04 | 6.24E+07 | 1.05E+03 | 3.59E+02 | 1.11E+05 | 3.00E+02 |
| 95  | CL13 | CL | This study | 1.48E+10 | 7.33E+04 | 6.87E+07 | 1.34E+03 | 3.79E+02 | 7.54E+04 | 3.00E+02 |
| 96  | CL14 | CL | This study | 1.33E+10 | 7.92E+04 | 6.98E+07 | 1.19E+03 | 3.67E+02 | 1.12E+05 | 3.00E+02 |
| 97  | CL15 | CL | This study | 1.57E+10 | 4.77E+04 | 4.76E+07 | 1.46E+03 | 3.87E+02 | 2.24E+05 | 3.00E+02 |
| 98  | CL16 | CL | This study | 1.59E+10 | 5.26E+04 | 5.35E+07 | 1.62E+03 | 3.85E+02 | 2.39E+05 | 3.00E+02 |
| 99  | CL17 | CL | This study | 1.34E+10 | 7.72E+04 | 7.47E+07 | 1.44E+03 | 3.76E+02 | 9.26E+05 | 3.00E+02 |
| 100 | CL18 | CL | This study | 1.83E+10 | 7.38E+04 | 5.78E+07 | 9.22E+02 | 3.61E+02 | 1.46E+05 | 3.00E+02 |
| 101 | CL21 | CL | This study | 1.39E+10 | 3.95E+04 | 3.71E+07 | 1.44E+03 | 3.71E+02 | 1.68E+05 | 3.00E+02 |
| 102 | CL22 | CL | This study | 1.53E+10 | 7.50E+04 | 6.95E+07 | 1.31E+03 | 3.79E+02 | 6.44E+04 | 3.00E+02 |
| 103 | CL23 | CL | This study | 1.48E+10 | 7.62E+04 | 6.94E+07 | 1.31E+03 | 3.66E+02 | 1.89E+05 | 3.00E+02 |
| 104 | CL24 | CL | This study | 1.48E+10 | 9.06E+04 | 8.61E+07 | 1.49E+03 | 3.60E+02 | 3.44E+05 | 3.00E+02 |
| 105 | CL25 | CL | This study | 1.50E+10 | 5.09E+04 | 4.82E+07 | 1.36E+03 | 3.79E+02 | 2.25E+05 | 3.00E+02 |

|     |                 |    |                |          |          |          |          |          |          |          |
|-----|-----------------|----|----------------|----------|----------|----------|----------|----------|----------|----------|
| 106 | CL26            | CL | This study     | 1.56E+10 | 8.87E+04 | 8.03E+07 | 1.27E+03 | 3.70E+02 | 1.69E+05 | 3.00E+02 |
| 107 | CL27            | CL | This study     | 1.47E+10 | 7.56E+04 | 7.02E+07 | 1.33E+03 | 3.74E+02 | 1.25E+05 | 3.00E+02 |
| 108 | CL28            | CL | This study     | 1.63E+10 | 1.09E+05 | 8.43E+07 | 1.02E+03 | 3.37E+02 | 2.45E+05 | 3.00E+02 |
| 109 | CL29            | CL | This study     | 1.52E+10 | 1.01E+05 | 9.15E+07 | 1.27E+03 | 3.69E+02 | 2.33E+05 | 3.00E+02 |
| 110 | CL30            | CL | This study     | 1.60E+10 | 6.21E+04 | 5.14E+07 | 1.07E+03 | 3.57E+02 | 1.07E+05 | 3.00E+02 |
| 111 | 19              |    | published data | 1.05E+10 | 9.82E+04 | 6.93E+07 | 7.91E+02 | 3.57E+02 | 4.90E+04 | 3.00E+02 |
| 112 | 20131124-ZX-F03 |    | published data | 9.37E+09 | 1.05E+05 | 8.29E+07 | 9.32E+02 | 3.54E+02 | 1.12E+05 | 3.00E+02 |
| 113 | 20140128-zx-F03 |    | published data | 1.16E+10 | 3.48E+04 | 3.39E+07 | 1.53E+03 | 3.85E+02 | 7.01E+04 | 3.00E+02 |
| 114 | 23              |    | published data | 7.76E+09 | 3.27E+05 | 2.18E+08 | 6.96E+02 | 3.49E+02 | 5.86E+04 | 3.00E+02 |
| 115 | 31              |    | published data | 7.07E+09 | 1.08E+05 | 6.06E+07 | 5.25E+02 | 3.31E+02 | 5.27E+04 | 3.00E+02 |
| 116 | 34              |    | published data | 7.78E+09 | 4.25E+05 | 2.37E+08 | 5.46E+02 | 3.38E+02 | 3.62E+04 | 3.00E+02 |
| 117 | 50              |    | published data | 7.12E+09 | 1.51E+05 | 8.21E+07 | 5.09E+02 | 3.30E+02 | 5.73E+04 | 3.00E+02 |

|     |                |  |                |          |          |          |          |          |          |          |
|-----|----------------|--|----------------|----------|----------|----------|----------|----------|----------|----------|
| 118 | 9              |  | published data | 8.51E+09 | 1.30E+04 | 1.18E+07 | 1.23E+03 | 3.59E+02 | 2.60E+05 | 3.00E+02 |
| 119 | CDXM18         |  | published data | 8.48E+09 | 9.89E+04 | 7.47E+07 | 8.27E+02 | 3.58E+02 | 1.64E+05 | 3.00E+02 |
| 120 | CDXM27         |  | published data | 8.23E+09 | 1.84E+05 | 1.48E+08 | 9.39E+02 | 3.67E+02 | 5.92E+04 | 3.00E+02 |
| 121 | CDXM39         |  | published data | 9.79E+09 | 1.31E+05 | 1.03E+08 | 9.15E+02 | 3.69E+02 | 9.56E+04 | 3.00E+02 |
| 122 | CDXM40         |  | published data | 1.21E+10 | 7.09E+04 | 6.43E+07 | 1.27E+03 | 3.81E+02 | 9.28E+04 | 3.00E+02 |
| 123 | LX3            |  | published data | 2.33E+09 | 4.31E+04 | 4.71E+07 | 1.67E+03 | 4.32E+02 | 9.66E+04 | 3.00E+02 |
| 124 | LZP1           |  | published data | 1.62E+09 | 2.14E+04 | 3.60E+07 | 3.75E+03 | 5.65E+02 | 3.17E+05 | 3.00E+02 |
| 125 | TT1            |  | published data | 5.88E+08 | 9.15E+03 | 1.02E+07 | 3.40E+03 | 4.00E+02 | 1.14E+05 | 3.00E+02 |
| 126 | TT2            |  | published data | 4.26E+09 | 3.83E+04 | 5.58E+07 | 3.14E+03 | 5.00E+02 | 2.21E+05 | 3.00E+02 |
| 127 | CD.m71.110914  |  | published data | 6.67E+09 | 1.18E+04 | 2.84E+07 | 9.81E+03 | 6.96E+02 | 2.32E+05 | 3.00E+02 |
| 128 | CD.m77.111001  |  | published data | 2.79E+09 | 1.30E+04 | 1.89E+07 | 7.19E+03 | 4.45E+02 | 1.55E+05 | 3.00E+02 |
| 129 | CD.m121.111017 |  | published data | 5.70E+09 | 1.87E+04 | 2.88E+07 | 6.50E+03 | 4.47E+02 | 3.05E+05 | 3.00E+02 |



|     |                |  |                |          |          |          |          |          |          |          |
|-----|----------------|--|----------------|----------|----------|----------|----------|----------|----------|----------|
| 130 | CD.70.130117   |  | published data | 7.14E+09 | 3.76E+04 | 3.59E+07 | 1.39E+03 | 3.95E+02 | 6.79E+04 | 3.00E+02 |
| 131 | CD.73.130415   |  | published data | 5.02E+09 | 5.57E+04 | 5.09E+07 | 1.27E+03 | 3.80E+02 | 5.50E+04 | 3.00E+02 |
| 132 | CX.m1.110827   |  | published data | 7.17E+09 | 3.33E+03 | 1.40E+07 | 6.89E+04 | 1.11E+03 | 2.34E+05 | 3.00E+02 |
| 133 | CX.m18.110917  |  | published data | 3.85E+09 | 1.51E+04 | 2.08E+07 | 7.11E+03 | 4.30E+02 | 3.63E+05 | 3.00E+02 |
| 134 | CX.m31.111104  |  | published data | 5.42E+09 | 2.23E+04 | 2.77E+07 | 5.69E+03 | 4.09E+02 | 2.58E+05 | 3.00E+02 |
| 135 | CX.39.130208   |  | published data | 5.10E+09 | 2.81E+04 | 2.10E+07 | 8.26E+02 | 3.59E+02 | 8.33E+04 | 3.00E+02 |
| 136 | CX.6.121213    |  | published data | 7.43E+09 | 1.44E+05 | 1.08E+08 | 7.75E+02 | 3.61E+02 | 4.59E+05 | 3.00E+02 |
| 137 | EQ.m114.110825 |  | published data | 4.67E+09 | 8.27E+03 | 1.42E+07 | 1.59E+04 | 4.75E+02 | 4.06E+05 | 3.00E+02 |
| 138 | EQ.m164.111020 |  | published data | 4.51E+09 | 2.68E+04 | 2.89E+07 | 1.87E+03 | 4.00E+02 | 2.21E+05 | 3.00E+02 |
| 139 | EQ.m168.111104 |  | published data | 1.98E+09 | 4.61E+04 | 4.32E+07 | 1.39E+03 | 3.74E+02 | 2.32E+05 | 3.00E+02 |
| 140 | EQ.118.130124  |  | published data | 7.77E+09 | 4.62E+04 | 4.38E+07 | 1.28E+03 | 3.96E+02 | 2.27E+05 | 3.00E+02 |
| 141 | EQ.128.130507  |  | published data | 5.34E+09 | 9.21E+04 | 8.79E+07 | 1.38E+03 | 3.93E+02 | 1.42E+05 | 3.00E+02 |

|     |                |  |                |          |          |          |          |          |          |          |
|-----|----------------|--|----------------|----------|----------|----------|----------|----------|----------|----------|
| 142 | HH.m275.080925 |  | published data | 3.66E+09 | 2.60E+04 | 2.63E+07 | 2.02E+03 | 3.83E+02 | 2.99E+05 | 3.00E+02 |
| 143 | HH.m278.081017 |  | published data | 2.73E+09 | 2.50E+04 | 3.52E+07 | 6.42E+03 | 4.26E+02 | 2.51E+05 | 3.00E+02 |
| 144 | HH.186.090510  |  | published data | 4.78E+09 | 5.53E+04 | 5.78E+07 | 1.58E+03 | 4.05E+02 | 3.65E+05 | 3.00E+02 |
| 145 | HH.m281.081225 |  | published data | 2.94E+09 | 5.76E+04 | 5.57E+07 | 1.38E+03 | 3.86E+02 | 1.15E+05 | 3.00E+02 |
| 146 | HH.192.090930  |  | published data | 4.73E+09 | 9.57E+04 | 8.46E+07 | 1.15E+03 | 3.84E+02 | 6.94E+04 | 3.00E+02 |
| 147 | HQ.m125.110820 |  | published data | 4.74E+09 | 6.43E+03 | 1.03E+07 | 3.57E+03 | 5.32E+02 | 1.08E+05 | 3.00E+02 |
| 148 | HQ.m34.110906  |  | published data | 7.56E+09 | 6.82E+03 | 1.50E+07 | 9.40E+03 | 5.90E+02 | 1.75E+05 | 3.00E+02 |
| 149 | HQ.m55.111105  |  | published data | 2.49E+09 | 4.65E+04 | 3.63E+07 | 8.19E+02 | 3.81E+02 | 1.42E+05 | 3.00E+02 |
| 150 | HQ.47.130816   |  | published data | 9.40E+09 | 3.51E+05 | 3.17E+08 | 1.16E+03 | 4.01E+02 | 1.75E+05 | 3.00E+02 |
| 151 | HQ.59.130113   |  | published data | 4.92E+09 | 2.82E+04 | 2.39E+07 | 1.09E+03 | 3.67E+02 | 1.28E+05 | 3.00E+02 |
| 152 | JJ.m100.110929 |  | published data | 4.29E+09 | 1.94E+04 | 2.51E+07 | 4.26E+03 | 4.14E+02 | 2.32E+05 | 3.00E+02 |
| 153 | JJ.m88.110820  |  | published data | 4.65E+09 | 1.33E+04 | 2.14E+07 | 4.90E+03 | 4.90E+02 | 2.40E+05 | 3.00E+02 |

|     |                |  |                |          |          |          |          |          |          |          |
|-----|----------------|--|----------------|----------|----------|----------|----------|----------|----------|----------|
| 154 | JJ.m95.110911  |  | published data | 7.88E+09 | 1.69E+04 | 3.09E+07 | 4.12E+03 | 6.09E+02 | 1.13E+05 | 3.00E+02 |
| 155 | JJ.234.130208  |  | published data | 4.88E+09 | 3.74E+04 | 2.91E+07 | 9.32E+02 | 3.61E+02 | 5.62E+04 | 3.00E+02 |
| 156 | JJ.257.130514  |  | published data | 5.50E+09 | 1.03E+05 | 8.98E+07 | 1.08E+03 | 3.95E+02 | 5.27E+04 | 3.00E+02 |
| 157 | NN.m221.080829 |  | published data | 2.65E+09 | 3.33E+04 | 3.23E+07 | 1.81E+03 | 3.78E+02 | 1.28E+05 | 3.00E+02 |
| 158 | NN.m228.081002 |  | published data | 4.99E+09 | 2.70E+04 | 2.80E+07 | 1.77E+03 | 3.95E+02 | 1.73E+05 | 3.00E+02 |
| 159 | NN.144.090425  |  | published data | 7.39E+09 | 6.29E+04 | 7.17E+07 | 2.09E+03 | 4.14E+02 | 3.05E+05 | 3.00E+02 |
| 160 | NN.m238.081204 |  | published data | 3.01E+09 | 4.68E+04 | 4.91E+07 | 2.19E+03 | 3.83E+02 | 3.58E+05 | 3.00E+02 |
| 161 | NN.149.091002  |  | published data | 7.39E+09 | 5.29E+04 | 4.46E+07 | 1.02E+03 | 3.89E+02 | 4.59E+04 | 3.00E+02 |
| 162 | QF.m322.080927 |  | published data | 5.01E+09 | 3.92E+03 | 1.21E+07 | 2.54E+04 | 7.57E+02 | 1.73E+05 | 3.00E+02 |
| 163 | QF.131.090529  |  | published data | 5.16E+09 | 3.94E+04 | 3.73E+07 | 1.31E+03 | 3.98E+02 | 1.37E+05 | 3.00E+02 |
| 164 | QF.m330.081218 |  | published data | 4.10E+09 | 5.71E+04 | 6.39E+07 | 2.68E+03 | 3.88E+02 | 3.76E+05 | 3.00E+02 |
| 165 | QF.m333.090121 |  | published data | 4.04E+09 | 6.11E+04 | 7.06E+07 | 2.39E+03 | 4.05E+02 | 4.95E+05 | 3.00E+02 |

|     |                |  |                |          |          |          |          |          |          |          |
|-----|----------------|--|----------------|----------|----------|----------|----------|----------|----------|----------|
| 166 | QF.135.091001  |  | published data | 6.93E+09 | 9.41E+04 | 8.50E+07 | 1.15E+03 | 3.93E+02 | 2.43E+05 | 3.00E+02 |
| 167 | QQ.m135.110814 |  | published data | 4.88E+09 | 3.69E+03 | 1.35E+07 | 4.00E+04 | 1.02E+03 | 3.39E+05 | 3.00E+02 |
| 168 | QQ.m152.111015 |  | published data | 6.50E+09 | 2.28E+04 | 2.60E+07 | 2.35E+03 | 4.07E+02 | 1.67E+05 | 3.00E+02 |
| 169 | QQ.102.130620  |  | published data | 5.05E+09 | 2.11E+05 | 1.80E+08 | 1.07E+03 | 3.93E+02 | 6.04E+04 | 3.00E+02 |
| 170 | QQ.98.130411   |  | published data | 4.80E+09 | 6.36E+04 | 5.97E+07 | 1.28E+03 | 3.95E+02 | 5.52E+04 | 3.00E+02 |
| 171 | SY.m195.080827 |  | published data | 4.90E+09 | 2.12E+04 | 3.31E+07 | 4.80E+03 | 4.70E+02 | 2.96E+05 | 3.00E+02 |
| 172 | SY.m202.081002 |  | published data | 1.67E+09 | 3.29E+04 | 3.46E+07 | 2.16E+03 | 3.88E+02 | 2.06E+05 | 3.00E+02 |
| 173 | SY.m210.081125 |  | published data | 1.41E+09 | 4.85E+04 | 4.02E+07 | 9.30E+02 | 3.64E+02 | 3.35E+05 | 3.00E+02 |
| 174 | SY.167.091121  |  | published data | 7.13E+09 | 5.05E+04 | 6.95E+07 | 3.88E+03 | 4.49E+02 | 2.48E+05 | 3.00E+02 |
| 175 | YL.m252.080918 |  | published data | 5.44E+09 | 9.92E+03 | 2.35E+07 | 1.87E+04 | 6.05E+02 | 2.68E+05 | 3.00E+02 |
| 176 | YL.m265.090109 |  | published data | 5.05E+09 | 3.65E+04 | 5.13E+07 | 3.97E+03 | 4.40E+02 | 3.76E+05 | 3.00E+02 |
| 177 | YL.m264.081212 |  | published data | 4.45E+09 | 2.99E+04 | 4.12E+07 | 3.80E+03 | 4.42E+02 | 1.32E+05 | 3.00E+02 |

|     |                |  |                |          |          |          |          |          |          |          |
|-----|----------------|--|----------------|----------|----------|----------|----------|----------|----------|----------|
| 178 | YL.173.090701  |  | published data | 5.30E+09 | 3.43E+04 | 7.01E+07 | 9.13E+03 | 5.54E+02 | 3.82E+05 | 3.00E+02 |
| 179 | YL.178.091015  |  | published data | 6.98E+09 | 7.34E+04 | 8.34E+07 | 2.04E+03 | 4.20E+02 | 1.40E+05 | 3.00E+02 |
| 180 | ZZ.m173.110828 |  | published data | 4.92E+09 | 6.87E+03 | 2.22E+07 | 2.04E+04 | 9.83E+02 | 3.43E+05 | 3.00E+02 |
| 181 | ZZ.m183.110929 |  | published data | 4.42E+09 | 4.25E+04 | 3.25E+07 | 8.64E+02 | 3.68E+02 | 1.08E+05 | 3.00E+02 |
| 182 | ZZ.m188.111015 |  | published data | 4.17E+09 | 2.21E+04 | 2.08E+07 | 1.39E+03 | 3.88E+02 | 1.08E+05 | 3.00E+02 |
| 183 | ZZ.109.130808  |  | published data | 5.25E+09 | 4.98E+04 | 3.51E+07 | 7.74E+02 | 3.65E+02 | 4.46E+04 | 3.00E+02 |
| 184 | FY1.27         |  | published data | 5.49E+09 | 1.97E+05 | 9.50E+07 | 4.25E+02 | 3.17E+02 | 9.65E+04 | 3.00E+02 |
| 185 | DL1            |  | published data | 5.30E+09 | 1.19E+05 | 6.61E+07 | 5.00E+02 | 3.24E+02 | 8.88E+04 | 3.00E+02 |
| 186 | WG             |  | published data | 5.16E+09 | 2.28E+05 | 1.11E+08 | 4.46E+02 | 3.20E+02 | 8.87E+04 | 3.00E+02 |
| 187 | GZ1.9.2        |  | published data | 5.56E+09 | 9.53E+04 | 7.79E+07 | 1.02E+03 | 3.50E+02 | 3.43E+05 | 3.00E+02 |
| 188 | ZM2.1.27       |  | published data | 5.90E+09 | 4.68E+04 | 4.01E+07 | 1.06E+03 | 3.60E+02 | 7.60E+05 | 3.00E+02 |
| 189 | HH             |  | published data | 4.72E+09 | 1.75E+05 | 9.17E+07 | 4.69E+02 | 3.22E+02 | 1.52E+05 | 3.00E+02 |

**Table S6 All the 144 MGS.**

| MGS_ID   | Genes | kindom          | phylum                | class                      | order                    | family                    | genus              | species                          |
|----------|-------|-----------------|-----------------------|----------------------------|--------------------------|---------------------------|--------------------|----------------------------------|
| CAG00001 | 15966 | <i>Bacteria</i> | <i>Proteobacteria</i> | <i>Gammaproteobacteria</i> | <i>Enterobacteriales</i> | <i>Enterobacteriaceae</i> |                    |                                  |
| CAG00007 | 7944  | <i>Bacteria</i> | <i>Proteobacteria</i> | <i>Alphaproteobacteria</i> | <i>Rhizobiales</i>       | <i>Rhizobiaceae</i>       | <i>Rhizobium</i>   |                                  |
| CAG00008 | 6970  | <i>Bacteria</i> | <i>Proteobacteria</i> | <i>Gammaproteobacteria</i> | <i>Enterobacteriales</i> | <i>Enterobacteriaceae</i> | <i>Providencia</i> | <i>Providencia_alcalifaciens</i> |
| CAG00009 | 6363  | <i>Bacteria</i> | <i>Firmicutes</i>     | <i>Bacilli</i>             | <i>Lactobacillales</i>   | <i>Leuconostocaceae</i>   |                    |                                  |
| CAG00010 | 5741  | <i>Bacteria</i> | <i>Proteobacteria</i> | <i>Gammaproteobacteria</i> | <i>Enterobacteriales</i> | <i>Enterobacteriaceae</i> | <i>Kluyvera</i>    |                                  |
| CAG00011 | 5735  | <i>Bacteria</i> | <i>Proteobacteria</i> | <i>Gammaproteobacteria</i> | <i>Enterobacteriales</i> | <i>Enterobacteriaceae</i> | <i>Hafnia</i>      | <i>Hafnia_alvei</i>              |
| CAG00012 | 5337  | <i>Bacteria</i> | <i>Firmicutes</i>     | <i>Bacilli</i>             | <i>Lactobacillales</i>   | <i>Streptococcaceae</i>   | <i>Lactococcus</i> | <i>Lactococcus_raffinolactis</i> |
| CAG00013 | 5213  | <i>Bacteria</i> | <i>Proteobacteria</i> | <i>Gammaproteobacteria</i> | <i>Enterobacteriales</i> | <i>Enterobacteriaceae</i> | <i>Pantoea</i>     | <i>Pantoea_ananatis</i>          |
| CAG00014 | 4932  | <i>Bacteria</i> | <i>Proteobacteria</i> | <i>Gammaproteobacteria</i> | <i>Enterobacteriales</i> | <i>Enterobacteriaceae</i> |                    |                                  |
| CAG00015 | 4663  | <i>Bacteria</i> | <i>Proteobacteria</i> | <i>Gammaproteobacteria</i> | <i>Enterobacteriales</i> | <i>Enterobacteriaceae</i> | <i>Klebsiella</i>  |                                  |

|          |      |                 |                       |                            |                            |                             |                          |                                 |
|----------|------|-----------------|-----------------------|----------------------------|----------------------------|-----------------------------|--------------------------|---------------------------------|
| CAG00016 | 4529 | <i>Bacteria</i> | <i>Firmicutes</i>     |                            |                            |                             |                          |                                 |
| CAG00017 | 4502 | <i>Bacteria</i> | <i>Proteobacteria</i> | <i>Gammaproteobacteria</i> | <i>Enterobacteriales</i>   | <i>Enterobacteriaceae</i>   | <i>Raoultella</i>        |                                 |
| CAG00018 | 4486 | <i>Bacteria</i> | <i>Actinobacteria</i> | <i>Actinobacteria</i>      | <i>Propionibacteriales</i> | <i>Propionibacteriaceae</i> | <i>Propionibacterium</i> |                                 |
| CAG00021 | 4191 | <i>Bacteria</i> | <i>Firmicutes</i>     | <i>Erysipelotrichia</i>    | <i>Erysipelotrichales</i>  | <i>Erysipelotrichaceae</i>  | <i>Turcibacter</i>       | <i>Turcibacter_sanguinis</i>    |
| CAG00023 | 3960 | <i>Bacteria</i> | <i>Proteobacteria</i> | <i>Gammaproteobacteria</i> | <i>Enterobacteriales</i>   | <i>Enterobacteriaceae</i>   | <i>Citrobacter</i>       |                                 |
| CAG00024 | 3839 | <i>Bacteria</i> |                       |                            |                            |                             |                          |                                 |
| CAG00026 | 3638 | <i>Bacteria</i> | <i>Proteobacteria</i> | <i>Gammaproteobacteria</i> | <i>Enterobacteriales</i>   | <i>Enterobacteriaceae</i>   |                          |                                 |
| CAG00027 | 3632 | <i>Bacteria</i> | <i>Proteobacteria</i> | <i>Gammaproteobacteria</i> | <i>Enterobacteriales</i>   | <i>Enterobacteriaceae</i>   | <i>Leclercia</i>         | <i>Leclercia_adecarboxylata</i> |
| CAG00028 | 3451 | <i>Bacteria</i> | <i>Proteobacteria</i> | <i>Gammaproteobacteria</i> | <i>Enterobacteriales</i>   | <i>Enterobacteriaceae</i>   | <i>Kluyvera</i>          | <i>Kluyvera_ascorbata</i>       |
| CAG00034 | 3178 | <i>Bacteria</i> | <i>Firmicutes</i>     | <i>Clostridia</i>          | <i>Clostridiales</i>       | <i>Clostridiaceae</i>       | <i>Clostridium</i>       |                                 |
| CAG00035 | 3177 | <i>Bacteria</i> | <i>Proteobacteria</i> | <i>Gammaproteobacteria</i> | <i>Enterobacteriales</i>   | <i>Enterobacteriaceae</i>   | <i>Enterobacter</i>      |                                 |
| CAG00036 | 3176 | <i>Bacteria</i> | <i>Proteobacteria</i> | <i>Gammaproteobacteria</i> | <i>Pseudomonadales</i>     | <i>Pseudomonadaceae</i>     | <i>Pseudomonas</i>       | <i>Pseudomonas_fragi</i>        |

|          |      |                 |                       |                            |                           |                            |                      |                                    |
|----------|------|-----------------|-----------------------|----------------------------|---------------------------|----------------------------|----------------------|------------------------------------|
| CAG00037 | 3170 | <i>Bacteria</i> | <i>Firmicutes</i>     | <i>Bacilli</i>             | <i>Lactobacillales</i>    | <i>Leuconostocaceae</i>    | <i>Leuconostoc</i>   |                                    |
| CAG00039 | 3010 | <i>Bacteria</i> | <i>Proteobacteria</i> | <i>Gammaproteobacteria</i> | <i>Enterobacteriales</i>  | <i>Enterobacteriaceae</i>  |                      |                                    |
| CAG00040 | 2969 | <i>Bacteria</i> | <i>Proteobacteria</i> | <i>Gammaproteobacteria</i> | <i>Enterobacteriales</i>  | <i>Enterobacteriaceae</i>  | <i>Morganella</i>    | <i>Morganella_morganii</i>         |
| CAG00041 | 2944 | <i>Bacteria</i> | <i>Proteobacteria</i> | <i>Gammaproteobacteria</i> | <i>Pseudomonadales</i>    | <i>Pseudomonadaceae</i>    | <i>Pseudomonas</i>   | <i>Pseudomonas_helleri</i>         |
| CAG00042 | 2934 | <i>Bacteria</i> | <i>Firmicutes</i>     | <i>Bacilli</i>             | <i>Lactobacillales</i>    | <i>Enterococcaceae</i>     | <i>Enterococcus</i>  |                                    |
| CAG00043 | 2835 | <i>Bacteria</i> | <i>Firmicutes</i>     | <i>Bacilli</i>             | <i>Lactobacillales</i>    | <i>Streptococcaceae</i>    | <i>Streptococcus</i> | <i>Streptococcus_orisratti</i>     |
| CAG00044 | 2822 | <i>Bacteria</i> | <i>Firmicutes</i>     | <i>Erysipelotrichia</i>    | <i>Erysipelotrichales</i> | <i>Erysipelotrichaceae</i> | <i>Turicibacter</i>  |                                    |
| CAG00045 | 2809 | <i>Bacteria</i> | <i>Firmicutes</i>     | <i>Erysipelotrichia</i>    | <i>Erysipelotrichales</i> | <i>Erysipelotrichaceae</i> | <i>Turicibacter</i>  | <i>unclassified_g_Turicibacter</i> |
| CAG00046 | 2788 | <i>Bacteria</i> | <i>Proteobacteria</i> | <i>Gammaproteobacteria</i> | <i>Enterobacteriales</i>  | <i>Enterobacteriaceae</i>  | <i>Providencia</i>   | <i>Providencia_rettgeri</i>        |
| CAG00047 | 2750 | <i>Bacteria</i> | <i>Proteobacteria</i> | <i>Gammaproteobacteria</i> | <i>Enterobacteriales</i>  | <i>Enterobacteriaceae</i>  |                      |                                    |
| CAG00048 | 2750 | <i>Bacteria</i> | <i>Proteobacteria</i> | <i>Gammaproteobacteria</i> | <i>Enterobacteriales</i>  | <i>Enterobacteriaceae</i>  | <i>Cedecea</i>       | <i>Cedecea_davisae</i>             |
| CAG00049 | 2738 | <i>Bacteria</i> | <i>Proteobacteria</i> | <i>Gammaproteobacteria</i> | <i>Enterobacteriales</i>  | <i>Enterobacteriaceae</i>  | <i>Moellerella</i>   | <i>Moellerella_wisconsensis</i>    |



|          |      |          |                |                     |                   |                       |                  |                              |
|----------|------|----------|----------------|---------------------|-------------------|-----------------------|------------------|------------------------------|
| CAG00050 | 2667 | Bacteria | Proteobacteria | Gammaproteobacteria | Pseudomonadales   | Pseudomonadaceae      | Pseudomonas      |                              |
| CAG00051 | 2662 | Bacteria | Proteobacteria | Gammaproteobacteria | Enterobacteriales | Enterobacteriaceae    | Yersinia         |                              |
| CAG00052 | 2597 | Bacteria | Proteobacteria | Gammaproteobacteria | Enterobacteriales | Enterobacteriaceae    | Escherichia      |                              |
| CAG00053 | 2590 | Bacteria | Firmicutes     | Clostridia          | Clostridiales     | Clostridiaceae        | Clostridium      |                              |
| CAG00054 | 2570 | Bacteria | Firmicutes     | Clostridia          | Clostridiales     | Lachnospiraceae       | Cellulosilyticum | Cellulosilyticum_lentocellum |
| CAG00055 | 2564 | Bacteria | Firmicutes     | Clostridia          | Clostridiales     | Clostridiaceae        | Clostridium      | Clostridium_sp._JCC          |
| CAG00058 | 2530 | Bacteria | Proteobacteria | Gammaproteobacteria | Pseudomonadales   | Pseudomonadaceae      | Pseudomonas      | Pseudomonas_fragi            |
| CAG00061 | 2462 | Bacteria | Firmicutes     | Clostridia          | Clostridiales     | Peptostreptococcaceae | Terrisporobacter | Terrisporobacter_othiniensis |
| CAG00062 | 2429 | Bacteria | Firmicutes     | Clostridia          | Clostridiales     | Clostridiaceae        | Clostridium      |                              |
| CAG00063 | 2423 | Bacteria | Firmicutes     | Clostridia          | Clostridiales     | Clostridiaceae        | Clostridium      | Clostridium_sp._7_2_43FAA    |
| CAG00065 | 2404 | Bacteria | Firmicutes     | Clostridia          | Clostridiales     | Clostridiaceae        | Clostridium      |                              |
| CAG00070 | 2337 | Bacteria | Firmicutes     | Bacilli             | Lactobacillales   | Enterococcaceae       | Enterococcus     | Enterococcus_casseliflavus   |

|          |      |                 |                       |                            |                          |                           |                       |                                    |
|----------|------|-----------------|-----------------------|----------------------------|--------------------------|---------------------------|-----------------------|------------------------------------|
| CAG00071 | 2326 | <i>Bacteria</i> | <i>Firmicutes</i>     | <i>Bacilli</i>             | <i>Lactobacillales</i>   | <i>Lactobacillaceae</i>   | <i>Lactobacillus</i>  | <i>Lactobacillus_plantarum</i>     |
| CAG00072 | 2276 | <i>Bacteria</i> | <i>Proteobacteria</i> | <i>Gammaproteobacteria</i> | <i>Enterobacteriales</i> | <i>Enterobacteriaceae</i> | <i>Rahnella</i>       |                                    |
| CAG00074 | 2207 | <i>Bacteria</i> | <i>Proteobacteria</i> | <i>Gammaproteobacteria</i> | <i>Pasteurellales</i>    | <i>Pasteurellaceae</i>    | <i>Actinobacillus</i> | <i>Actinobacillus_succinogenes</i> |
| CAG00075 | 2171 | <i>Bacteria</i> | <i>Firmicutes</i>     | <i>Bacilli</i>             | <i>Lactobacillales</i>   | <i>Enterococcaceae</i>    | <i>Enterococcus</i>   |                                    |
| CAG00076 | 2170 | <i>Bacteria</i> | <i>Firmicutes</i>     | <i>Clostridia</i>          | <i>Clostridiales</i>     | <i>Clostridiaceae</i>     | <i>Clostridium</i>    |                                    |
| CAG00077 | 2159 | <i>Bacteria</i> | <i>Proteobacteria</i> | <i>Gammaproteobacteria</i> | <i>Enterobacteriales</i> | <i>Enterobacteriaceae</i> |                       |                                    |
| CAG00079 | 2140 | <i>Bacteria</i> | <i>Proteobacteria</i> | <i>Gammaproteobacteria</i> | <i>Pseudomonadales</i>   | <i>Pseudomonadaceae</i>   | <i>Pseudomonas</i>    | <i>Pseudomonas_helleri</i>         |
| CAG00080 | 2130 | <i>Bacteria</i> |                       |                            |                          |                           |                       |                                    |
| CAG00081 | 2128 | <i>Bacteria</i> | <i>Firmicutes</i>     | <i>Bacilli</i>             | <i>Lactobacillales</i>   | <i>Streptococcaceae</i>   | <i>Streptococcus</i>  | <i>Streptococcus_criceti</i>       |
| CAG00082 | 2121 | <i>Bacteria</i> | <i>Firmicutes</i>     | <i>Bacilli</i>             | <i>Bacillales</i>        | <i>Bacillaceae</i>        | <i>Bacillus</i>       |                                    |
| CAG00083 | 2071 | <i>Bacteria</i> | <i>Firmicutes</i>     | <i>Bacilli</i>             | <i>Lactobacillales</i>   | <i>Enterococcaceae</i>    | <i>Enterococcus</i>   | <i>unclassified_g_Enterococcus</i> |
| CAG00085 | 2028 | <i>Bacteria</i> | <i>Firmicutes</i>     | <i>Bacilli</i>             | <i>Lactobacillales</i>   | <i>Streptococcaceae</i>   | <i>Lactococcus</i>    | <i>Lactococcus_lactis</i>          |

|          |      |                 |                       |                              |                          |                           |                      |                                     |
|----------|------|-----------------|-----------------------|------------------------------|--------------------------|---------------------------|----------------------|-------------------------------------|
| CAG00089 | 1952 | <i>Bacteria</i> | <i>Firmicutes</i>     | <i>Bacilli</i>               | <i>Lactobacillales</i>   | <i>Leuconostocaceae</i>   | <i>Leuconostoc</i>   | <i>Leuconostoc_lactis</i>           |
| CAG00090 | 1940 | <i>Bacteria</i> | <i>Proteobacteria</i> | <i>Epsilonproteobacteria</i> | <i>Campylobacterales</i> | <i>Helicobacteraceae</i>  | <i>Helicobacter</i>  |                                     |
| CAG00091 | 1936 | <i>Bacteria</i> | <i>Proteobacteria</i> | <i>Epsilonproteobacteria</i> | <i>Campylobacterales</i> | <i>Campylobacteraceae</i> | <i>Campylobacter</i> | <i>Campylobacter_jejuni</i>         |
| CAG00093 | 1916 | <i>Bacteria</i> | <i>Proteobacteria</i> | <i>Gammaproteobacteria</i>   | <i>Pseudomonadales</i>   | <i>Pseudomonadaceae</i>   | <i>Pseudomonas</i>   |                                     |
| CAG00096 | 1861 | <i>Bacteria</i> | <i>Firmicutes</i>     | <i>Bacilli</i>               | <i>Lactobacillales</i>   | <i>Lactobacillaceae</i>   | <i>Lactobacillus</i> | <i>Lactobacillus_reuteri</i>        |
| CAG00098 | 1831 | <i>Bacteria</i> | <i>Firmicutes</i>     | <i>Clostridia</i>            | <i>Clostridiales</i>     | <i>Clostridiaceae</i>     | <i>Clostridium</i>   |                                     |
| CAG00100 | 1830 | <i>Bacteria</i> | <i>Firmicutes</i>     | <i>Bacilli</i>               | <i>Lactobacillales</i>   | <i>Streptococcaceae</i>   | <i>Lactococcus</i>   | <i>Lactococcus_garvieae</i>         |
| CAG00101 | 1828 | <i>Bacteria</i> | <i>Proteobacteria</i> | <i>Gammaproteobacteria</i>   | <i>Enterobacteriales</i> | <i>Enterobacteriaceae</i> | <i>Escherichia</i>   | <i>Escherichia_coli</i>             |
| CAG00102 | 1812 | <i>Bacteria</i> | <i>Proteobacteria</i> | <i>Gammaproteobacteria</i>   | <i>Pseudomonadales</i>   | <i>Pseudomonadaceae</i>   | <i>Pseudomonas</i>   | <i>Pseudomonas_sp_CBZ-4</i>         |
| CAG00103 | 1805 | <i>Bacteria</i> | <i>Firmicutes</i>     | <i>Bacilli</i>               | <i>Lactobacillales</i>   | <i>Enterococcaceae</i>    | <i>Enterococcus</i>  | <i>Enterococcus_sulfureus</i>       |
| CAG00105 | 1741 | <i>Bacteria</i> | <i>Firmicutes</i>     | <i>Bacilli</i>               | <i>Lactobacillales</i>   | <i>Streptococcaceae</i>   | <i>Streptococcus</i> | <i>unclassified_g_Streptococcus</i> |
| CAG00106 | 1738 | <i>Bacteria</i> | <i>Proteobacteria</i> | <i>Gammaproteobacteria</i>   | <i>Enterobacteriales</i> | <i>Enterobacteriaceae</i> |                      |                                     |

|          |      |                 |                       |                            |                          |                           |                      |                                  |
|----------|------|-----------------|-----------------------|----------------------------|--------------------------|---------------------------|----------------------|----------------------------------|
| CAG00107 | 1736 | <i>Bacteria</i> | <i>Firmicutes</i>     | <i>Bacilli</i>             | <i>Lactobacillales</i>   | <i>Streptococcaceae</i>   | <i>Streptococcus</i> |                                  |
| CAG00108 | 1709 | <i>Bacteria</i> | <i>Firmicutes</i>     | <i>Bacilli</i>             | <i>Lactobacillales</i>   | <i>Streptococcaceae</i>   | <i>Streptococcus</i> | <i>Streptococcus_caballi</i>     |
| CAG00113 | 1668 | <i>Bacteria</i> | <i>Proteobacteria</i> | <i>Gammaproteobacteria</i> | <i>Enterobacteriales</i> | <i>Enterobacteriaceae</i> | <i>Providencia</i>   | <i>Providencia_alcalifaciens</i> |
| CAG00114 | 1660 | <i>Bacteria</i> | <i>Firmicutes</i>     | <i>Clostridia</i>          | <i>Clostridiales</i>     | <i>Clostridiaceae</i>     | <i>Clostridium</i>   |                                  |
| CAG00115 | 1656 | <i>Bacteria</i> | <i>Firmicutes</i>     | <i>Bacilli</i>             | <i>Lactobacillales</i>   | <i>Streptococcaceae</i>   | <i>Lactococcus</i>   | <i>Lactococcus_lactis</i>        |
| CAG00116 | 1642 | <i>Bacteria</i> | <i>Proteobacteria</i> | <i>Gammaproteobacteria</i> | <i>Enterobacteriales</i> | <i>Enterobacteriaceae</i> |                      |                                  |
| CAG00119 | 1636 | <i>Bacteria</i> | <i>Proteobacteria</i> | <i>Alphaproteobacteria</i> | <i>Rhizobiales</i>       | <i>Bradyrhizobiaceae</i>  | <i>Afipia</i>        | <i>unclassified_g_Afipia</i>     |
| CAG00120 | 1634 | <i>Bacteria</i> | <i>Proteobacteria</i> | <i>Gammaproteobacteria</i> | <i>Enterobacteriales</i> | <i>Enterobacteriaceae</i> | <i>Enterobacter</i>  |                                  |
| CAG00122 | 1618 | <i>Bacteria</i> | <i>Firmicutes</i>     | <i>Bacilli</i>             | <i>Lactobacillales</i>   | <i>Leuconostocaceae</i>   | <i>Weissella</i>     | <i>Weissella_confusa</i>         |
| CAG00123 | 1617 | <i>Bacteria</i> | <i>Proteobacteria</i> | <i>Gammaproteobacteria</i> | <i>Enterobacteriales</i> | <i>Enterobacteriaceae</i> |                      |                                  |
| CAG00125 | 1607 | <i>Bacteria</i> | <i>Proteobacteria</i> | <i>Gammaproteobacteria</i> | <i>Enterobacteriales</i> | <i>Enterobacteriaceae</i> | <i>Hafnia</i>        | <i>Hafnia_alvei</i>              |
| CAG00126 | 1563 | <i>Bacteria</i> | <i>Proteobacteria</i> | <i>Gammaproteobacteria</i> | <i>Enterobacteriales</i> | <i>Enterobacteriaceae</i> |                      |                                  |

|          |      |                 |                       |                            |                          |                           |                         |                                 |
|----------|------|-----------------|-----------------------|----------------------------|--------------------------|---------------------------|-------------------------|---------------------------------|
| CAG00127 | 1562 | <i>Bacteria</i> | <i>Firmicutes</i>     | <i>Clostridia</i>          | <i>Clostridiales</i>     | <i>Clostridiaceae</i>     | <i>Clostridium</i>      |                                 |
| CAG00130 | 1516 | <i>Bacteria</i> | <i>Firmicutes</i>     | <i>Bacilli</i>             | <i>Lactobacillales</i>   | <i>Lactobacillaceae</i>   | <i>Lactobacillus</i>    | <i>Lactobacillus_mucosae</i>    |
| CAG00131 | 1515 | <i>Bacteria</i> | <i>Proteobacteria</i> | <i>Alphaproteobacteria</i> | <i>Rhizobiales</i>       |                           |                         |                                 |
| CAG00132 | 1506 | <i>Bacteria</i> | <i>Firmicutes</i>     | <i>Clostridia</i>          | <i>Clostridiales</i>     | <i>Clostridiaceae</i>     | <i>Clostridium</i>      | <i>Clostridium_sp._CL-6</i>     |
| CAG00133 | 1467 | <i>Fungi</i>    | <i>Ascomycota</i>     | <i>Dothideomycetes</i>     | <i>Pleosporales</i>      | <i>Phaeosphaeriaceae</i>  | <i>Parastagonospora</i> | <i>Parastagonospora_nodorum</i> |
| CAG00134 | 1457 | <i>Bacteria</i> | <i>Firmicutes</i>     | <i>Clostridia</i>          | <i>Clostridiales</i>     | <i>Clostridiaceae</i>     | <i>Clostridium</i>      |                                 |
| CAG00135 | 1448 | <i>Bacteria</i> | <i>Proteobacteria</i> | <i>Gammaproteobacteria</i> | <i>Pseudomonadales</i>   | <i>Pseudomonadaceae</i>   | <i>Pseudomonas</i>      |                                 |
| CAG00136 | 1445 | <i>Bacteria</i> | <i>Proteobacteria</i> | <i>Gammaproteobacteria</i> | <i>Pseudomonadales</i>   | <i>Pseudomonadaceae</i>   | <i>Pseudomonas</i>      | <i>Pseudomonas_fragi</i>        |
| CAG00137 | 1444 | <i>Bacteria</i> | <i>Proteobacteria</i> | <i>Gammaproteobacteria</i> | <i>Enterobacteriales</i> | <i>Enterobacteriaceae</i> | <i>Enterobacter</i>     |                                 |
| CAG00139 | 1422 | <i>Bacteria</i> | <i>Proteobacteria</i> | <i>Gammaproteobacteria</i> | <i>Pseudomonadales</i>   | <i>Pseudomonadaceae</i>   | <i>Pseudomonas</i>      |                                 |
| CAG00142 | 1388 | <i>Bacteria</i> | <i>Firmicutes</i>     | <i>Bacilli</i>             | <i>Lactobacillales</i>   | <i>Streptococcaceae</i>   | <i>Streptococcus</i>    | <i>Streptococcus_sobrinus</i>   |
| CAG00143 | 1370 | <i>Bacteria</i> | <i>Actinobacteria</i> | <i>Actinobacteria</i>      | <i>Micrococcales</i>     | <i>Microbacteriaceae</i>  | <i>Microbacterium</i>   |                                 |

|          |      |                 |                       |                            |                          |                           |                         |                                     |
|----------|------|-----------------|-----------------------|----------------------------|--------------------------|---------------------------|-------------------------|-------------------------------------|
| CAG00144 | 1358 | <i>Bacteria</i> | <i>Firmicutes</i>     | <i>Clostridia</i>          | <i>Clostridiales</i>     | <i>Lachnospiraceae</i>    | <i>Cellulosilyticum</i> | <i>Cellulosilyticum_lentocellum</i> |
| CAG00145 | 1338 | <i>Bacteria</i> | <i>Firmicutes</i>     | <i>Bacilli</i>             | <i>Lactobacillales</i>   | <i>Streptococcaceae</i>   | <i>Streptococcus</i>    | <i>Streptococcus_ratti</i>          |
| CAG00147 | 1323 | <i>Bacteria</i> | <i>Proteobacteria</i> | <i>Gammaproteobacteria</i> | <i>Pseudomonadales</i>   | <i>Pseudomonadaceae</i>   | <i>Pseudomonas</i>      |                                     |
| CAG00148 | 1321 | <i>Bacteria</i> | <i>Proteobacteria</i> | <i>Gammaproteobacteria</i> | <i>Enterobacteriales</i> | <i>Enterobacteriaceae</i> | <i>Escherichia</i>      | <i>Escherichia_fergusonii</i>       |
| CAG00149 | 1320 | <i>Bacteria</i> | <i>Proteobacteria</i> | <i>Gammaproteobacteria</i> | <i>Enterobacteriales</i> | <i>Enterobacteriaceae</i> |                         |                                     |
| CAG00150 | 1316 | <i>Bacteria</i> | <i>Proteobacteria</i> | <i>Gammaproteobacteria</i> | <i>Pseudomonadales</i>   | <i>Moraxellaceae</i>      | <i>Acinetobacter</i>    | <i>Acinetobacter_rudis</i>          |
| CAG00151 | 1313 | <i>Bacteria</i> | <i>Proteobacteria</i> | <i>Gammaproteobacteria</i> | <i>Pseudomonadales</i>   | <i>Pseudomonadaceae</i>   | <i>Pseudomonas</i>      | <i>Pseudomonas_deceptionensis</i>   |
| CAG00153 | 1262 | <i>Bacteria</i> | <i>Firmicutes</i>     | <i>Bacilli</i>             | <i>Lactobacillales</i>   | <i>Streptococcaceae</i>   | <i>Streptococcus</i>    |                                     |
| CAG00154 | 1227 | <i>Bacteria</i> | <i>Firmicutes</i>     | <i>Negativicutes</i>       | <i>Selenomonadales</i>   | <i>Veillonellaceae</i>    | <i>Veillonella</i>      | <i>Veillonella_sp_AS16</i>          |
| CAG00156 | 1212 | <i>Bacteria</i> | <i>Proteobacteria</i> | <i>Gammaproteobacteria</i> | <i>Pseudomonadales</i>   | <i>Pseudomonadaceae</i>   | <i>Pseudomonas</i>      |                                     |
| CAG00157 | 1211 | <i>Bacteria</i> | <i>Firmicutes</i>     | <i>Bacilli</i>             | <i>Bacillales</i>        | <i>Bacillaceae</i>        | <i>Lysinibacillus</i>   | <i>Lysinibacillus_contaminans</i>   |
| CAG00158 | 1196 | <i>Bacteria</i> | <i>Firmicutes</i>     | <i>Bacilli</i>             | <i>Lactobacillales</i>   | <i>Enterococcaceae</i>    | <i>Enterococcus</i>     | <i>Enterococcus_raffinosis</i>      |

|          |      |                 |                       |                            |                           |                            |                      |                                    |
|----------|------|-----------------|-----------------------|----------------------------|---------------------------|----------------------------|----------------------|------------------------------------|
| CAG00160 | 1178 | <i>Bacteria</i> | <i>Proteobacteria</i> | <i>Gammaproteobacteria</i> | <i>Enterobacteriales</i>  | <i>Enterobacteriaceae</i>  |                      |                                    |
| CAG00161 | 1167 | <i>Bacteria</i> | <i>Firmicutes</i>     | <i>Bacilli</i>             | <i>Lactobacillales</i>    | <i>Enterococcaceae</i>     | <i>Enterococcus</i>  | <i>unclassified_g_Enterococcus</i> |
| CAG00162 | 1161 | <i>Bacteria</i> | <i>Proteobacteria</i> | <i>Gammaproteobacteria</i> | <i>Enterobacteriales</i>  | <i>Enterobacteriaceae</i>  | <i>Escherichia</i>   | <i>Escherichia_coli</i>            |
| CAG00163 | 1160 | <i>Bacteria</i> | <i>Firmicutes</i>     | <i>Bacilli</i>             | <i>Lactobacillales</i>    | <i>Streptococcaceae</i>    | <i>Streptococcus</i> | <i>Streptococcus_ferus</i>         |
| CAG00164 | 1154 | <i>Bacteria</i> | <i>Proteobacteria</i> | <i>Gammaproteobacteria</i> |                           |                            |                      |                                    |
| CAG00165 | 1146 | <i>Bacteria</i> | <i>Proteobacteria</i> | <i>Gammaproteobacteria</i> | <i>Enterobacteriales</i>  | <i>Enterobacteriaceae</i>  | <i>Escherichia</i>   | <i>Escherichia_coli</i>            |
| CAG00168 | 1113 | <i>Bacteria</i> | <i>Firmicutes</i>     | <i>Erysipelotrichia</i>    | <i>Erysipelotrichales</i> | <i>Erysipelotrichaceae</i> | <i>Turicibacter</i>  | <i>Turicibacter_sanguinis</i>      |
| CAG00169 | 1109 | <i>Bacteria</i> | <i>Proteobacteria</i> | <i>Gammaproteobacteria</i> | <i>Aeromonadales</i>      | <i>Aeromonadaceae</i>      | <i>Aeromonas</i>     | <i>Aeromonas_hydrophila</i>        |
| CAG00171 | 1069 | <i>Bacteria</i> | <i>Proteobacteria</i> | <i>Gammaproteobacteria</i> | <i>Enterobacteriales</i>  | <i>Enterobacteriaceae</i>  | <i>Cedecea</i>       | <i>Cedecea_davisae</i>             |
| CAG00173 | 1040 | <i>Bacteria</i> | <i>Firmicutes</i>     | <i>Bacilli</i>             | <i>Lactobacillales</i>    | <i>Streptococcaceae</i>    | <i>Lactococcus</i>   | <i>Lactococcus_lactis</i>          |
| CAG00174 | 1031 | <i>Bacteria</i> | <i>Proteobacteria</i> | <i>Gammaproteobacteria</i> | <i>Enterobacteriales</i>  | <i>Enterobacteriaceae</i>  | <i>Serratia</i>      |                                    |
| CAG00175 | 1026 | <i>Bacteria</i> | <i>Proteobacteria</i> | <i>Gammaproteobacteria</i> | <i>Enterobacteriales</i>  | <i>Enterobacteriaceae</i>  | <i>Raoultella</i>    | <i>Raoultella_ornithinolytica</i>  |

|          |     |                 |                       |                            |                          |                           |                       |                                |
|----------|-----|-----------------|-----------------------|----------------------------|--------------------------|---------------------------|-----------------------|--------------------------------|
| CAG00177 | 985 | <i>Bacteria</i> | <i>Firmicutes</i>     | <i>Clostridia</i>          | <i>Clostridiales</i>     | <i>Clostridiaceae</i>     | <i>Clostridium</i>    |                                |
| CAG00178 | 977 | <i>Bacteria</i> | <i>Firmicutes</i>     | <i>Bacilli</i>             | <i>Lactobacillales</i>   | <i>Leuconostocaceae</i>   | <i>Weissella</i>      | <i>Weissella_cibaria</i>       |
| CAG00180 | 967 | <i>Bacteria</i> | <i>Firmicutes</i>     | <i>Bacilli</i>             | <i>Lactobacillales</i>   | <i>Lactobacillaceae</i>   | <i>Lactobacillus</i>  | <i>Lactobacillus_johnsonii</i> |
| CAG00182 | 954 | <i>Bacteria</i> | <i>Firmicutes</i>     | <i>Clostridia</i>          | <i>Clostridiales</i>     | <i>Clostridiaceae</i>     | <i>Clostridium</i>    | <i>Clostridium_sp._CAG:221</i> |
| CAG00183 | 954 | <i>Bacteria</i> | <i>Firmicutes</i>     | <i>Clostridia</i>          | <i>Clostridiales</i>     | <i>Clostridiaceae</i>     | <i>Clostridium</i>    |                                |
| CAG00185 | 951 | <i>Bacteria</i> | <i>Proteobacteria</i> | <i>Gammaproteobacteria</i> | <i>Enterobacteriales</i> | <i>Enterobacteriaceae</i> |                       |                                |
| CAG00186 | 943 | <i>Bacteria</i> | <i>Proteobacteria</i> | <i>Gammaproteobacteria</i> | <i>Enterobacteriales</i> | <i>Enterobacteriaceae</i> | <i>Citrobacter</i>    |                                |
| CAG00188 | 928 | <i>Bacteria</i> | <i>Firmicutes</i>     | <i>Bacilli</i>             | <i>Bacillales</i>        | <i>Bacillaceae</i>        | <i>Lysinibacillus</i> |                                |
| CAG00190 | 913 | <i>Bacteria</i> | <i>Proteobacteria</i> | <i>Gammaproteobacteria</i> | <i>Enterobacteriales</i> | <i>Enterobacteriaceae</i> |                       |                                |
| CAG00191 | 912 | <i>Bacteria</i> | <i>Proteobacteria</i> | <i>Gammaproteobacteria</i> | <i>Enterobacteriales</i> | <i>Enterobacteriaceae</i> | <i>Providencia</i>    |                                |
| CAG00192 | 904 | <i>Bacteria</i> | <i>Firmicutes</i>     | <i>Clostridia</i>          | <i>Clostridiales</i>     | <i>Clostridiaceae</i>     | <i>Clostridium</i>    |                                |
| CAG00193 | 897 | <i>Bacteria</i> | <i>Firmicutes</i>     | <i>Clostridia</i>          | <i>Clostridiales</i>     | <i>Clostridiaceae</i>     | <i>Clostridium</i>    | <i>Clostridium_sp._ND2</i>     |



|          |     |                 |                       |                            |                          |                           |                      |                               |
|----------|-----|-----------------|-----------------------|----------------------------|--------------------------|---------------------------|----------------------|-------------------------------|
| CAG00195 | 872 | <i>Bacteria</i> | <i>Proteobacteria</i> | <i>Gammaproteobacteria</i> | <i>Pseudomonadales</i>   | <i>Pseudomonadaceae</i>   | <i>Pseudomonas</i>   |                               |
| CAG00197 | 842 | <i>Bacteria</i> | <i>Proteobacteria</i> | <i>Gammaproteobacteria</i> | <i>Enterobacteriales</i> | <i>Enterobacteriaceae</i> | <i>Enterobacter</i>  |                               |
| CAG00201 | 822 | <i>Bacteria</i> | <i>Firmicutes</i>     | <i>Bacilli</i>             | <i>Lactobacillales</i>   | <i>Lactobacillaceae</i>   | <i>Lactobacillus</i> |                               |
| CAG00202 | 814 | <i>Bacteria</i> | <i>Proteobacteria</i> | <i>Gammaproteobacteria</i> | <i>Enterobacteriales</i> | <i>Enterobacteriaceae</i> |                      |                               |
| CAG00203 | 814 | <i>Bacteria</i> | <i>Firmicutes</i>     | <i>Clostridia</i>          | <i>Clostridiales</i>     | <i>Clostridiaceae</i>     | <i>Clostridium</i>   | <i>Clostridium_sp._Ade.TY</i> |
| CAG00206 | 790 | <i>Bacteria</i> | <i>Proteobacteria</i> | <i>Gammaproteobacteria</i> | <i>Enterobacteriales</i> | <i>Enterobacteriaceae</i> |                      |                               |
| CAG00207 | 790 | <i>Bacteria</i> | <i>Proteobacteria</i> | <i>Gammaproteobacteria</i> | <i>Enterobacteriales</i> | <i>Enterobacteriaceae</i> | <i>Escherichia</i>   |                               |
| CAG00208 | 788 | <i>Bacteria</i> | <i>Proteobacteria</i> | <i>Gammaproteobacteria</i> | <i>Enterobacteriales</i> | <i>Enterobacteriaceae</i> | <i>Escherichia</i>   | <i>Escherichia_coli</i>       |
| CAG00215 | 749 | <i>Bacteria</i> | <i>Proteobacteria</i> | <i>Gammaproteobacteria</i> | <i>Enterobacteriales</i> | <i>Enterobacteriaceae</i> | <i>Enterobacter</i>  |                               |
| CAG00216 | 747 | <i>Bacteria</i> | <i>Proteobacteria</i> | <i>Gammaproteobacteria</i> | <i>Enterobacteriales</i> | <i>Enterobacteriaceae</i> | <i>Citrobacter</i>   | <i>Citrobacter_freundii</i>   |
| CAG00217 | 745 | <i>Bacteria</i> | <i>Proteobacteria</i> | <i>Gammaproteobacteria</i> | <i>Enterobacteriales</i> | <i>Enterobacteriaceae</i> | <i>Citrobacter</i>   | <i>Citrobacter_pasteurii</i>  |
| CAG00218 | 745 | <i>Bacteria</i> | <i>Proteobacteria</i> | <i>Gammaproteobacteria</i> | <i>Enterobacteriales</i> | <i>Enterobacteriaceae</i> | <i>Morganella</i>    | <i>Morganella_morganii</i>    |

|          |     |                 |                   |                   |                      |                       |                    |  |
|----------|-----|-----------------|-------------------|-------------------|----------------------|-----------------------|--------------------|--|
| CAG00220 | 736 | <i>Bacteria</i> | <i>Firmicutes</i> | <i>Clostridia</i> | <i>Clostridiales</i> | <i>Clostridiaceae</i> | <i>Clostridium</i> |  |
| CAG00225 | 715 | <i>Bacteria</i> |                   |                   |                      |                       |                    |  |

**Table S7 All the 112 nonflavonoid compounds (NFCs) in feces.**

| NFC_no. | Compound name                         | Class           | HMDB                        |
|---------|---------------------------------------|-----------------|-----------------------------|
| 1       | COAMARIC ACID                         | phenylpropanoid | HMDB0041592                 |
| 2       | Indoleacetic acid                     | Indoles         | HMDB0000197                 |
| 3       | Salicylic acid                        | phenylpropanoid | HMDB0000840                 |
| 4       | Glutaric acid                         | Organic Acids   | HMDB0000661                 |
| 5       | N_acetyltryptophan                    | Amino Acids     | HMDB0013713                 |
| 6       | Cinnamic acid and trans_Cinnamic acid | phenylpropanoid | HMDB0000567/<br>HMDB0000930 |
| 7       | 2_Phenylpropionate                    | phenylpropanoid | HMDB0011743                 |
| 8       | Hydrocinnamic acid                    | phenylpropanoid | HMDB0000764                 |
| 9       | Indoleacrylic acid                    | Indoles         | HMDB0000734                 |
| 10      | 3_Indolepropionic acid                | Indoles         | HMDB0002302                 |
| 11      | 4_Hydroxyphenylpyruvic acid           | benzenoids      | HMDB0000707                 |
| 12      | 3_Methyl_2_oxovaleric acid            | Organic Acids   | HMDB0000491                 |
| 13      | Glycine                               | Amino Acids     | HMDB0000123                 |
| 14      | Glycolic acid                         | Organic Acids   | HMDB0000115                 |
| 15      | 3_Aminoisobutanoic acid               | Amino Acids     | HMDB0003911                 |
| 16      | Glyceric acid                         | Sugar Acids     | HMDB0000139                 |
| 17      | L_Proline                             | Amino Acids     | HMDB0000162                 |
| 18      | L_Pipecolic acid                      | Amino Acids     | HMDB0000716                 |

|    |                                             |                 |                         |
|----|---------------------------------------------|-----------------|-------------------------|
| 19 | p_Cresol sulfate                            | Organic Acids   | HMDB0011635             |
| 20 | L_Valine                                    | Amino Acids     | HMDB0000883             |
| 21 | Pyroglutamic acid                           | Amino Acids     | HMDB0000267             |
| 22 | 3_Hydroxybutyric acid                       | Organic Acids   | HMDB0000357             |
| 23 | 2_Hydroxybutyric acid                       | Fatty Acids     | HMDB0000008             |
| 24 | 3_Hydroxyisovaleric acid                    | Fatty Acids     | HMDB0000754             |
| 25 | L_Isoleucine and L_Leucine                  | Amino Acids     | HMDB0000172/HMDB0000687 |
| 26 | C3 0                                        | Fatty Acids     | HMDB0000237             |
| 27 | Melatonin                                   | Amino Acids     | HMDB0001389             |
| 28 | 3_3_Hydroxyphenyl_3_hydroxypropanoic acid   | phenylpropanoid | HMDB0002643             |
| 29 | p_Hydroxyphenylacetic acid                  | Phenols         | HMDB0000020             |
| 30 | L_Tryptophan                                | Amino Acids     | HMDB0000929             |
| 31 | C4 0                                        | Fatty Acids     | HMDB0000039             |
| 32 | Vanillic acid                               | Fatty Acids     | HMDB0000484             |
| 33 | Malonic acid                                | Fatty Acids     | HMDB0000691             |
| 34 | Tartaric acid                               | Sugar acids     | HMDB0000956             |
| 35 | L_3_Phenyllactic acid and Phenyllactic acid | phenylpropanoid | HMDB0000779             |
| 36 | Oxalic acid                                 | Organic Acids   | HMDB0002329             |
| 37 | Citraconic acid                             | Fatty Acids     | HMDB0000634             |
| 38 | Methylsuccinic acid                         | Fatty Acids     | HMDB0001844             |

|    |                          |                     |             |
|----|--------------------------|---------------------|-------------|
| 39 | Adipic acid              | Fatty Acids         | HMDB0000448 |
| 40 | L_Lysine                 | Amino Acids         | HMDB0000182 |
| 41 | cis_Aconitic acid        | Tricarboxylic acids | HMDB0000072 |
| 42 | Pimelic acid             | Organic Acids       | HMDB0000857 |
| 43 | 1_2_Methylpentanoic acid | Fatty Acids         | HMDB0031580 |
| 44 | 3_Methylpentanoic acid   | Fatty Acids         | HMDB0033774 |
| 45 | L_Histidine              | Amino Acids         | HMDB0000177 |
| 46 | C6 0                     | Fatty Acids         | HMDB0000535 |
| 47 | Suberic acid             | Organic Acids       | HMDB0000893 |
| 48 | Citric acid              | Tricarboxylic acids | HMDB0000094 |
| 49 | Isocitric acid           | Organic Acids       | HMDB0000193 |
| 50 | 2_Methylhexanoic acid    | Fatty Acids         | HMDB0031594 |
| 51 | C7 0                     | Fatty Acids         | HMDB0000666 |
| 52 | Oxoglutaric acid         | Organic Acids       | HMDB0000208 |
| 53 | C8 0                     | Fatty Acids         | HMDB0000482 |
| 54 | Oxoadipic acid           | Fatty Acids         | HMDB0000225 |
| 55 | C9 0                     | Fatty Acids         | HMDB0000847 |
| 56 | C10 0                    | Fatty Acids         | HMDB0000511 |
| 57 | 5_Dodecenoic acid        | Fatty Acids         | NA          |

|    |                                          |                 |             |
|----|------------------------------------------|-----------------|-------------|
| 58 | C12 0                                    | Fatty Acids     | HMDB0000638 |
| 59 | C14 1 cis_9                              | Fatty Acids     | HMDB0002000 |
| 60 | Phenylethylamine                         | phenylpropanoid | HMDB0012275 |
| 61 | C14 0                                    | Fatty Acids     | HMDB0000806 |
| 62 | C15 0                                    | Fatty Acids     | HMDB0000826 |
| 63 | C16 1 cis_9                              | Fatty Acids     | HMDB0003229 |
| 64 | C18 3 cis_9 12 15                        | Fatty Acids     | NA          |
| 65 | C18 2 cis_9 12                           | Fatty Acids     | HMDB0000673 |
| 66 | C20 4 cis_5 8 11 14                      | Fatty Acids     | HMDB0001043 |
| 67 | C20 3 cis_11 14 17 and C20 3 cis_8 11 14 | Fatty Acids     | HMDB0002925 |
| 68 | C22 6 cis_4 7 10 13 16 19                | Fatty Acids     | HMDB0002183 |
| 69 | C22 5 cis_4 7 10 13 16                   | Fatty Acids     | HMDB0001976 |
| 70 | Succinic acid                            | Fatty Acids     | HMDB0000254 |
| 71 | Citramalic acid                          | Fatty Acids     | HMDB0000426 |
| 72 | C16 0                                    | Fatty Acids     | HMDB0000220 |
| 73 | C17 0                                    | Fatty Acids     | HMDB0002259 |
| 74 | C18 0                                    | Fatty Acids     | HMDB0000827 |
| 75 | C20 1 cis_11                             | Fatty Acids     | HMDB0002231 |
| 76 | C20 1 trans_11 and C20 1 cis_8           | Fatty Acids     | NA          |
| 77 | C20 1 cis_5                              | Fatty Acids     | NA          |
| 78 | C22 3 cis_13 16 19                       | Fatty Acids     | HMDB0002823 |

|    |                                |                 |             |
|----|--------------------------------|-----------------|-------------|
| 79 | C20 0                          | Fatty Acids     | HMDB0002212 |
| 80 | C22 1 cis_13                   | Fatty Acids     | HMDB0002068 |
| 81 | C22 0                          | Fatty Acids     | HMDB0000944 |
| 82 | L_Serine                       | Amino Acids     | HMDB0000187 |
| 83 | Hydroxypropionic acid          | Fatty Acids     | HMDB0000700 |
| 84 | Ornithine                      | Amino Acids     | HMDB0000214 |
| 85 | 3_Methylindole                 | Indoles         | HMDB0000466 |
| 86 | Nicotinic acid                 | Organic Acids   | HMDB0001488 |
| 87 | 2_Phenylglycine                | Amino Acids     | HMDB0002210 |
| 88 | L_Tyrosine                     | Amino Acids     | HMDB0000158 |
| 89 | L_Asparagine                   | Amino Acids     | HMDB0000168 |
| 90 | L_Phenylalanine                | Amino Acids     | HMDB0000159 |
| 91 | Hydroxyphenyllactic acid       | phenylpropanoid | HMDB0000755 |
| 92 | L_Aspartic acid                | Amino Acids     | HMDB0000191 |
| 93 | Amino adipic acid              | Amino Acids     | HMDB0000510 |
| 94 | 4_Hydroxybenzoic acid          | Organic Acids   | HMDB0000500 |
| 95 | Ortho_Hydroxyphenylacetic acid | benzenoids      | HMDB0000669 |
| 96 | Hippuric acid                  | Organic Acids   | HMDB0000714 |
| 97 | L_Malic acid                   | Organic Acids   | HMDB0000156 |
| 98 | Ethylmethylacetic acid         | Fatty Acids     | HMDB0002176 |
| 99 | Phenylacetic acid              | Organic Acids   | HMDB0000209 |

|     |                              |             |             |
|-----|------------------------------|-------------|-------------|
| 100 | 3_Hydroxyphenylacetic acid   | Phenols     | HMDB0000440 |
| 101 | D_2_Hydroxyglutaric acid     | Amino Acids | HMDB0000606 |
| 102 | L_Methionine                 | Amino Acids | HMDB0000696 |
| 103 | alpha_Hydroxyisobutyric acid | Fatty Acids | HMDB0000729 |
| 104 | Dopamine                     | Phenols     | HMDB0000073 |
| 105 | Serotonin                    | Indoles     | HMDB0000259 |
| 106 | L_Glutamic acid              | Amino Acids | HMDB0000148 |
| 107 | Beta_Alanine                 | Amino Acids | HMDB0000056 |
| 108 | L_Alanine                    | Amino Acids | HMDB0000161 |
| 109 | C19 0                        | Fatty Acids | HMDB0000772 |
| 110 | Gamma_Aminobutyric acid      | Amino Acids | HMDB0000112 |
| 111 | C24 1 CIS_15                 | Fatty Acids | HMDB0002368 |
| 112 | C24 0                        | Fatty Acids | HMDB0002003 |
